# Supplementary material for: Synthesis, structure, oxygen evolution reaction (OER) and visible-light assisted organic reaction studies on A2M2TeB2O10 (A = Ba and Pb; M = Mg, Zn, Co, Ni, Cu, and Fe)
Source: Royal Society of Chemistry journal article supplement (doi:10.1039/d4dt02706j), 2024-12-04
Supplement: d4dt02706j1.pdf [file d4dt02706j1.pdf]

**Electronic Supporting information (ESI)**

| Table of Contents  |                                                                                                                                                                                     |             |
|--------------------|-------------------------------------------------------------------------------------------------------------------------------------------------------------------------------------|-------------|
| SI. No             | Description                                                                                                                                                                         | Page.No     |
|                    | Characterization                                                                                                                                                                    | S4          |
| <i>Figure S1</i>   | Crystal structure of $Ba_2Mg_2TeB_2O_{10}$ drawn from the Rietveld refinement data.                                                                                                 | S5          |
| <i>Figure S2</i>   | SEM-EDX spectra of $Ba_2(Mg_{2-x}M_x)TeB_2O_{10}$ ( $M = Zn, Co, Ni, Fe, Cu$ ) and $(Ba_{0.5}Pb_{1.5})(Mg_{2-x}M_x)TeB_2O_{10}$ ( $M = Co, Ni, Cu$ ).                               | S6-S8       |
| <i>Table S1.</i>   | Nuclear site group analysis for each atom in $A_2Mg_2TeB_2O_{10}$ ( $A=Ba/Pb$ ).                                                                                                    | S9          |
| <i>Table S2.</i>   | The observed Raman vibrational bands correspond to $BaO_{11}$ , $MgO_6$ , $MO_6$ ( $M = Zn, Co, Ni, Cu, Fe, In$ ), $TeO_6$ , $BO_3$ polyhedra.                                      | S10-<br>S11 |
| <i>Figure S3.</i>  | Raman spectra of (a) $Ba_2(Mg_{2-x}M_x)TeB_2O_{10}$ ( $M=Zn, Ni, Cu, Fe$ ) and (b) $(Ba_{0.5}Pb_{1.5})(Mg_{2-x}M_x)TeB_2O_{10}$ ( $M= Co, Ni, Cu$ ).                                | S12         |
| <i>Figure S4.</i>  | Optical absorption spectra for the prepared white-colored telluroborates.                                                                                                           | S13         |
| <i>Figure S5.</i>  | Optical absorption spectra for the $Ba_2(Mg_{2-x}Cu_x)TeB_2O_{10}$ ( $0 < x \leq 0.5$ ).                                                                                            | S13         |
| <i>Figure S6.</i>  | Optical absorption spectra for the $Ba_2(Mg_{2-x}Fe_x)TeB_2O_{10}$ ( $0 < x \leq 0.5$ ).                                                                                            | S14         |
| <i>Figure S7.</i>  | Optical absorption spectra for the $(Ba_{0.5}Pb_{1.5})(Mg_{2-x}Ni_x)TeB_2O_{10}$ . ( $0 < x \leq 0.75$ ).                                                                           | S14         |
| <i>Figure S8.</i>  | Optical absorption spectra for the $(Ba_{0.5}Pb_{1.5})(Mg_{2-x}Cu_x)TeB_2O_{10}$ ( $0 < x \leq 0.25$ ).                                                                             | S15         |
| <i>Table S3.</i>   | Colors of $Ba_2(Mg_{2-x}M^{II}_x)TeB_2O_{10}$ ( $M^{II} = Fe, Co, Ni, and Cu$ ) and $(Ba_{0.5}Pb_{1.5})(Mg_{2-x}M^{II}_x)TeB_2O_{10}$ ( $M^{II} = Co, Ni, and Cu$ ) under Daylight. | S16         |
| <i>Figure S9.</i>  | NIR reflectivity of the prepared white-colored telluroborates.                                                                                                                      | S17         |
| <i>Figure S10.</i> | PXRD pattern for acid and hot water stability of $Ba_2(MgCo)TeB_2O_{10}$ and $(Ba_{0.5}Pb_{1.5})(MgCo)TeB_2O_{10}$ .                                                                | S18         |
| <i>Figure S11.</i> | UV-Vis Spectra for acid and hot water stability of $Ba_2(MgCo)TeB_2O_{10}$ and $(Ba_{0.5}Pb_{1.5})(MgCo)TeB_2O_{10}$ .                                                              | S19         |
| <i>Figure S12.</i> | Color of the $(Ba_{2-x}Pb_x)(MgCo)TeB_2O_{10}$ before and after acid treatment, hot water stability.                                                                                | S20         |
| <i>Figure S13.</i> | Calibration of Reference electrode (Hg/HgO) electrode.                                                                                                                              | S21         |
| <i>Table S4.</i>   | The comparison of $(Ba_{0.5}Pb_{1.5})(MgCo)TeB_2O_{10}$ electrocatalyst with reported cobalt substituted metal oxide towards OER.                                                   | S22         |
| <i>Figure S14.</i> | The observed equivalent circuit in the electrochemical impedance spectroscopy.                                                                                                      | S23         |

|                    |                                                                                                                                                                                                                                                                                                                 |     |
|--------------------|-----------------------------------------------------------------------------------------------------------------------------------------------------------------------------------------------------------------------------------------------------------------------------------------------------------------|-----|
| <i>Figure S15.</i> | XPS spectra for Co 2 <i>p</i> spectra of C_(Ba <sub>0.5</sub> Pb <sub>1.5</sub> )(MgCo)TeB <sub>2</sub> O <sub>10</sub> for (a) pristine, (b) 1 <sup>st</sup> cycle (c) 500 <sup>th</sup> cycle, (d) 1000 <sup>th</sup> cycle of cyclic voltammetry scan of electrocatalyst in 0.5M KOH in the faradaic region. | S24 |
| <i>Table S5.</i>   | Binding energies of Co 2 <i>p</i> peaks in the XPS spectra of C_(Ba <sub>0.5</sub> Pb <sub>1.5</sub> )(MgCo)TeB <sub>2</sub> O <sub>10</sub> .                                                                                                                                                                  | S25 |
| <i>Figure S16.</i> | Electrochemically active surface area (ECSA) for the C_(Ba <sub>2</sub> )(MgCo)TeB <sub>2</sub> O <sub>10</sub> & C_(Ba <sub>0.5</sub> Pb <sub>1.5</sub> )(MgCo)TeB <sub>2</sub> O <sub>10</sub> .                                                                                                              | S26 |
| <i>Figure S17.</i> | Turn over frequency calculation for C_(Ba <sub>0.5</sub> Pb <sub>1.5</sub> )(MgCo)TeB <sub>2</sub> O <sub>10</sub> .                                                                                                                                                                                            | S27 |
| <i>Figure S18.</i> | Diagram of invert burette experimental setup.                                                                                                                                                                                                                                                                   | S28 |
| <i>Figure S19.</i> | Oxygen production efficiency of C_(Ba <sub>0.5</sub> Pb <sub>1.5</sub> )(MgCo)TeB <sub>2</sub> O <sub>10</sub> .                                                                                                                                                                                                | S29 |
| <i>Figure S20.</i> | The PXRD pattern for (a) Pristine Carbon Black, Acetylene (b) Electrocatalyst, (Ba <sub>0.5</sub> Pb <sub>1.5</sub> )(MgCo)TeB <sub>2</sub> O <sub>10</sub> (c) Mixture of acetylene black and electrocatalyst in glass substrate, before and after electrocatalysis.                                           | S30 |
| <i>Table S6.</i>   | Optimised reaction condition: Screening of starting materials.                                                                                                                                                                                                                                                  | S31 |
| <i>Table S7.</i>   | Optimised reaction condition: Solvent screening.                                                                                                                                                                                                                                                                | S31 |
| <i>Table S8.</i>   | Control experiments for oxochlorination of vinyl arene.                                                                                                                                                                                                                                                         | S32 |
| <i>Figure S21.</i> | PXRD Pattern of Ba <sub>2</sub> (Mg <sub>1.5</sub> Cu <sub>0.5</sub> )TeB <sub>2</sub> O <sub>10</sub> before and after photocatalysis.                                                                                                                                                                         | S33 |
| <i>Figure S22.</i> | The proposed reaction mechanism for the photocatalytic oxidative halogenation of vinyl arenes.                                                                                                                                                                                                                  | S34 |
| <i>Table S9.</i>   | The comparison of (Ba <sub>0.5</sub> Pb <sub>1.5</sub> )(MgCo)TeB <sub>2</sub> O <sub>10</sub> electrocatalyst with reported cobalt substituted metal oxide towards OER.                                                                                                                                        | S35 |
| <i>Figure S23.</i> | NMR Spectra of 2-Chloro-1-phenylethan-1-one                                                                                                                                                                                                                                                                     | S36 |
| <i>Figure S24.</i> | NMR Spectra of 2-Chloro-1-( <i>p</i> -tolyl)ethan-1-one                                                                                                                                                                                                                                                         | S36 |
| <i>Figure S25.</i> | NMR Spectra of 2-Chloro-1-(4-bromophenyl)ethan-1-one                                                                                                                                                                                                                                                            | S37 |
| <i>Figure S26.</i> | NMR Spectra of 2-Chloro-1-(4-chlorophenyl)ethan-1-one                                                                                                                                                                                                                                                           | S37 |
|                    | Reference                                                                                                                                                                                                                                                                                                       | S39 |

## Characterization

The diffuse reflectance data were converted to absorbance data employing the Kubelka–Munk<sup>1</sup> function by using the equation (1)

$$F(R) = \frac{(1 - R)^2}{2R} = \frac{\alpha}{S} \dots\dots\dots(1)$$

in which R is the reflectance,  $\alpha$  is absorptivity, and S is the scattering factor.

The optical band gaps were calculated from Tauc plots.<sup>2</sup> The Tauc relation (2) is

$$\alpha h\nu = A(h\nu - E_g)^n \dots\dots\dots(2)$$

where  $\alpha$  is absorption coefficient, A is a constant called the band tailing parameter, and n is the power factor of the transition mode. The plot of  $(\alpha h\nu)^{(1/n)}$  versus the photon energy (h $\nu$ ) gives a straight line in a certain region.<sup>3</sup> The extrapolation of this straight line intercepts the (h $\nu$ )-axis to give the value of the optical band gap ( $E_g$ ).

The working electrode was prepared by mixing 4 mg of the catalyst along with 1 mg of carbon black dispersed in 3:1 ratio of isopropanol and water mixture and 0.04 mL of Nafion. This suspension was ultrasonicated for 1-2 h to obtain a homogeneous mixture. This gave a loading of 0.255 mg/cm<sup>2</sup> of the catalyst. All the parameters were converted to reversible hydrogen electrode (RHE) scale using the Nernst equation<sup>4</sup> (equation 3). The overpotential ( $\eta$ ) was calculated using the formula

$$E_{RHE} = E_{Hg/HgO} + E^0_{Hg/HgO} + 0.059 \cdot pH \dots\dots\dots(3)$$

$$\eta = E_{RHE} - 1.23 \dots\dots\dots(4)$$

Both overpotential ( $\eta$ ) (thermodynamic parameter) and exchange current density ( $j_0$ ) (kinetic parameter) of the electrochemical reaction analysed by Butler-Volmer equation (equation 5). The Tafel analysis ( $\log|i|$  vs  $\eta_i$ ), when electrochemical reaction not in equilibrium (equation 6). This Tafel plot helps to understand the kinetics of the reaction.

$$i = i_0 \left( c_O e^{\frac{\alpha_c n_e F \eta}{RT}} - c_R e^{\frac{\alpha_a n_e F \eta}{RT}} \right) \dots\dots\dots(5)$$

$$\log|i| = \log|i_0| + (\alpha n F / 2.303 RT) \eta_i \dots\dots\dots(6)$$

In the above equation,  $\eta$ , R, T,  $\alpha$ , n, F and j indicate overpotential, gas constant, temperature in K, charge-transfer coefficient, number of electrons transferred per molecule of product formed during reaction and current density respectively.<sup>5</sup>

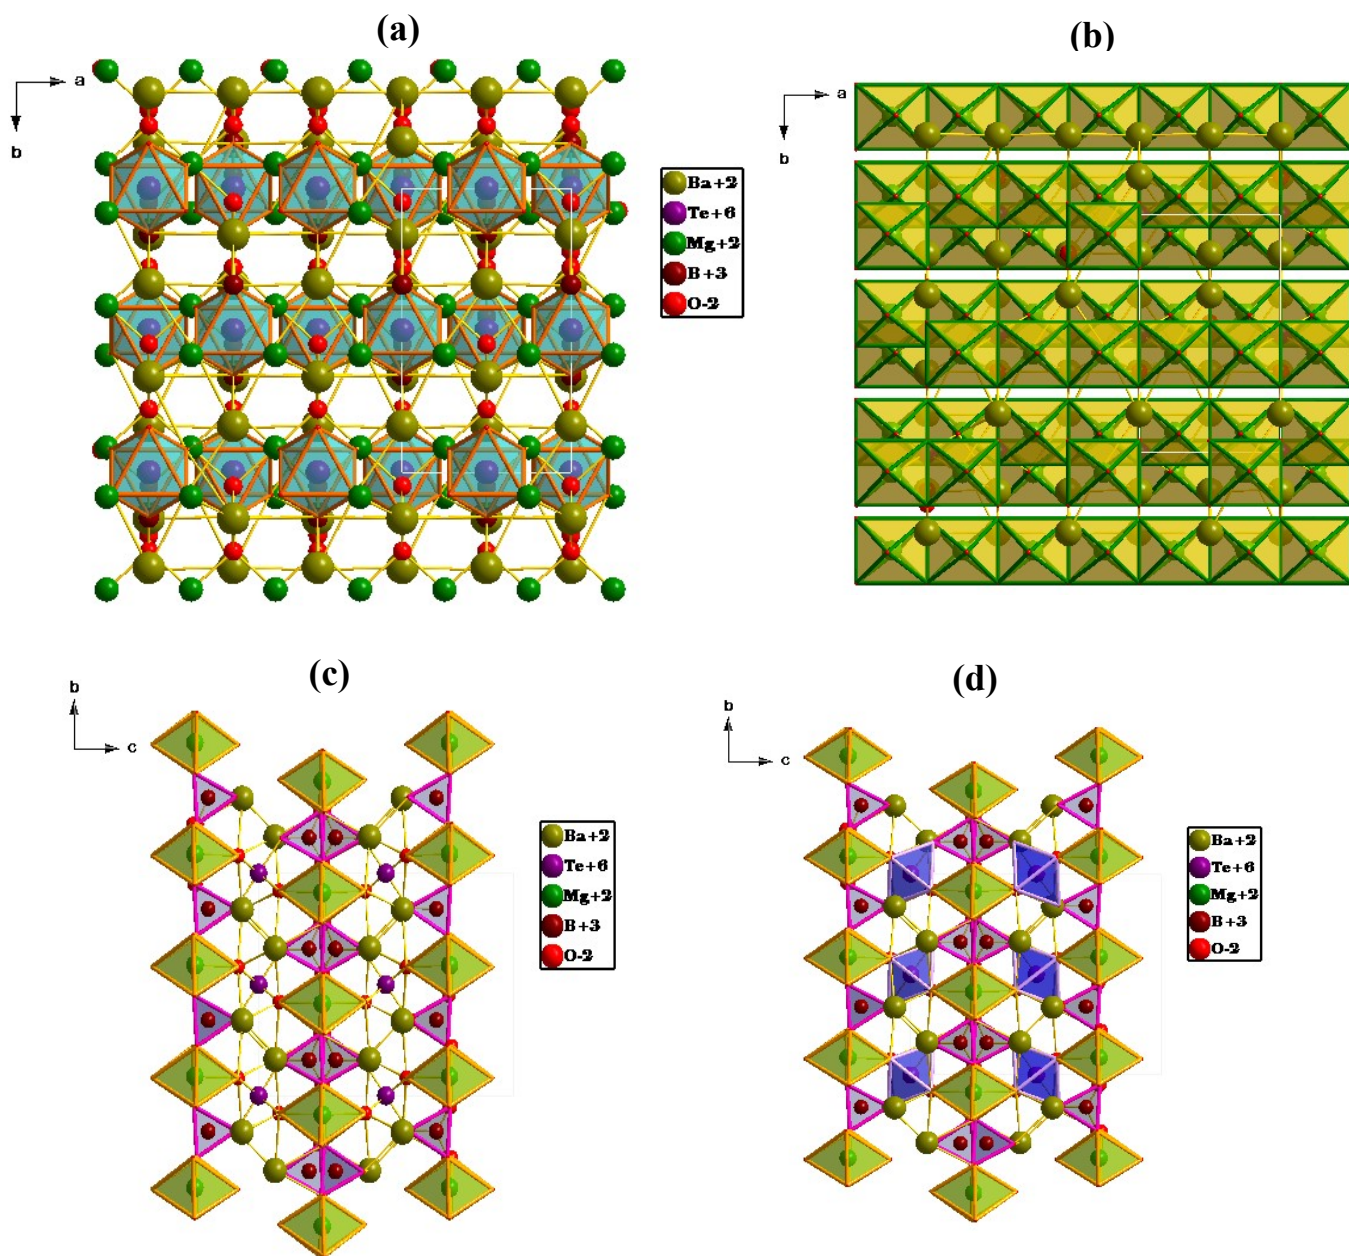

Figure S1. Crystal structure of  $\text{Ba}_2\text{Mg}_2\text{TeB}_2\text{O}_{10}$  drawn from the Rietveld refinement data.

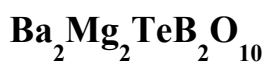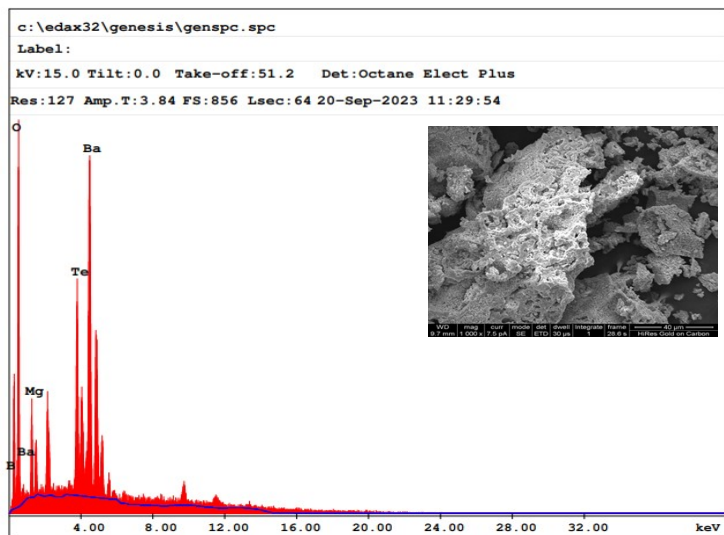

| Elements | Atomic weight (u) | Weight percentage (calculated) | Weight percentage (observed) | Atomic percentage (calculated) | Atomic percentage (observed) | Weight percentage /Atomic weight |
|----------|-------------------|--------------------------------|------------------------------|--------------------------------|------------------------------|----------------------------------|
| Ba L     | 137.327           | 43.425                         | 64.07                        | 11.765                         | 34.60                        | 0.3162                           |
| Mg K     | 24.305            | 7.685                          | 02.71                        | 11.765                         | 08.28                        | 0.3162                           |
| Te L     | 127.60            | 20.174                         | 24.44                        | 05.882                         | 14.21                        | 0.1581                           |
| B K      | 10.811            | 3.418                          | 01.00                        | 11.761                         | 06.85                        | 0.3161                           |
| O K      | 15.999            | 25.295                         | 07.78                        | 58.825                         | 36.06                        | 1.581                            |
| Total    | 632.476           | 100                            |                              | 100                            |                              | 2.6876                           |

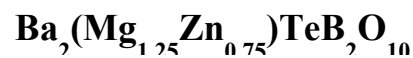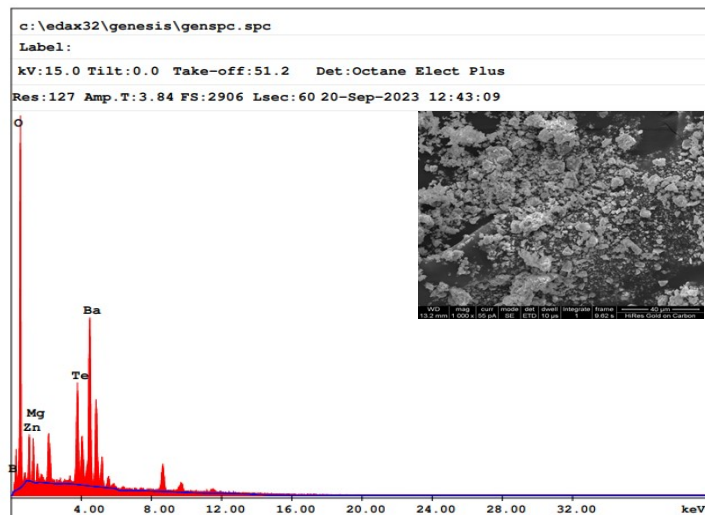

| Elements | Atomic weight (u) | Weight percentage (calculated) | Weight percentage (observed) | Atomic percentage (calculated) | Atomic percentage (observed) | Weight percentage /Atomic weight |
|----------|-------------------|--------------------------------|------------------------------|--------------------------------|------------------------------|----------------------------------|
| Ba L     | 137.327           | 41.400                         | 56.06                        | 11.767                         | 23.62                        | 0.30147                          |
| Mg K     | 24.305            | 4.580                          | 02.12                        | 07.355                         | 05.06                        | 0.18843                          |
| Zn L     | 65.380            | 7.390                          | 05.00                        | 04.412                         | 04.43                        | 0.11303                          |
| Te L     | 127.60            | 19.230                         | 21.73                        | 05.882                         | 09.86                        | 0.15070                          |
| B K      | 10.811            | 3.250                          | 01.43                        | 11.734                         | 07.64                        | 0.30061                          |
| O K      | 15.999            | 24.120                         | 13.66                        | 58.848                         | 49.40                        | 1.50759                          |
| Total    | 673.551           | 100                            |                              | 100                            |                              | 2.56183                          |

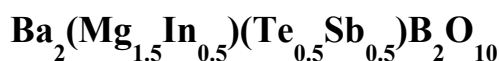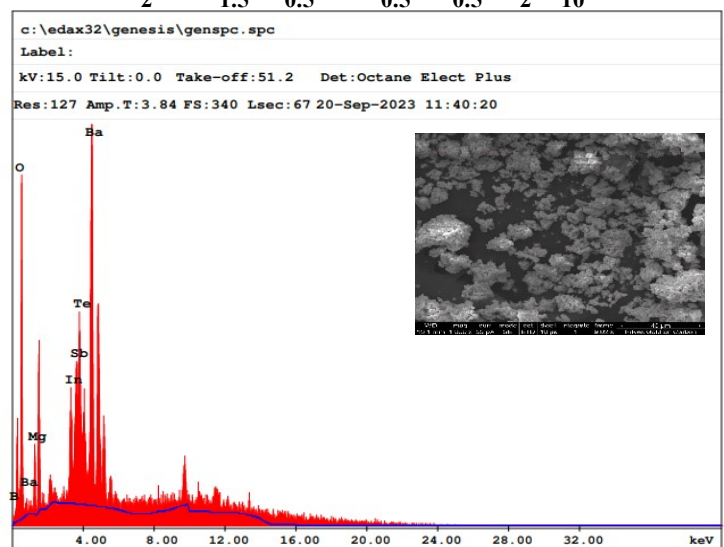

| Elements | Atomic weight (u) | Weight percentage (calculated) | Weight percentage (observed) | Atomic percentage (calculated) | Atomic percentage (observed) | Weight percentage /Atomic weight |
|----------|-------------------|--------------------------------|------------------------------|--------------------------------|------------------------------|----------------------------------|
| Ba L     | 137.327           | 40.700                         | 56.38                        | 11.764                         | 34.20                        | 0.2963                           |
| Mg K     | 24.305            | 5.402                          | 01.47                        | 8.822                          | 05.04                        | 0.2222                           |
| In L     | 114.818           | 8.507                          | 07.67                        | 2.938                          | 05.56                        | 0.0740                           |
| Sb L     | 121.760           | 9.021                          | 12.91                        | 2.938                          | 08.84                        | 0.0740                           |
| Te L     | 127.60            | 9.454                          | 14.87                        | 2.938                          | 09.71                        | 0.0740                           |
| B K      | 10.811            | 3.204                          | 00.69                        | 11.764                         | 05.30                        | 0.2963                           |

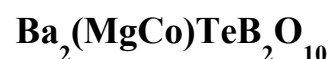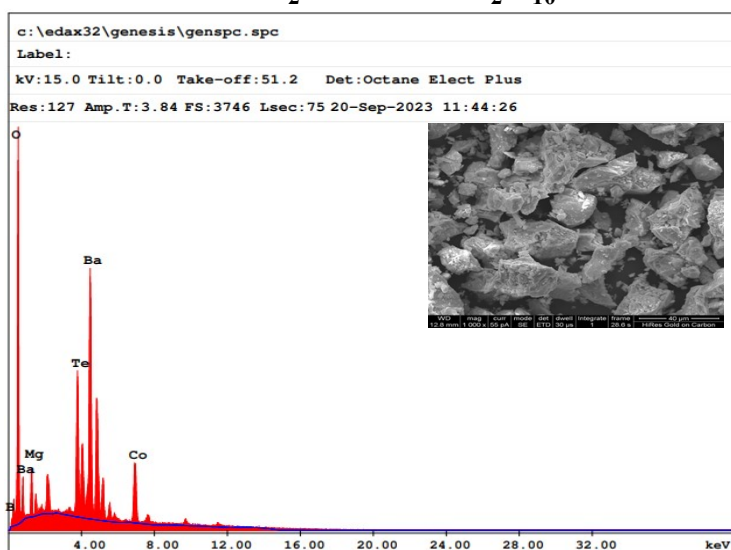

| Elements | Atomic weight (u) | Weight percentage (calculated) | Weight percentage (observed) | Atomic percentage (calculated) | Atomic percentage (observed) | Weight percentage /Atomic weight |
|----------|-------------------|--------------------------------|------------------------------|--------------------------------|------------------------------|----------------------------------|
| Ba L     | 137.327           | 41.171                         | 52.72                        | 11.767                         | 25.00                        | 0.2998                           |
| Mg K     | 24.305            | 3.643                          | 01.69                        | 5.879                          | 04.52                        | 0.1498                           |
| Co K     | 58.933            | 8.834                          | 14.30                        | 5.879                          | 15.80                        | 0.1498                           |
| Te L     | 127.60            | 19.127                         | 20.99                        | 5.879                          | 10.71                        | 0.1498                           |
| B K      | 10.811            | 3.241                          | 01.06                        | 11.763                         | 06.37                        | 0.2997                           |

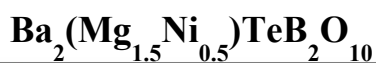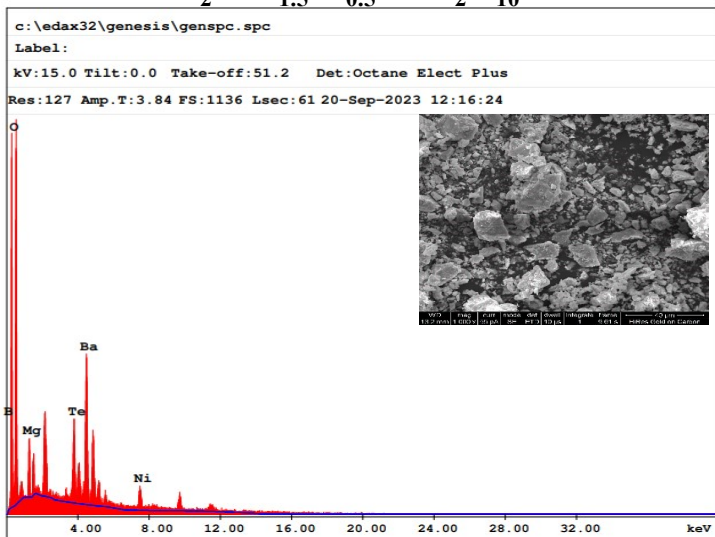

| Elements | Atomic weight (u) | Weight percentage (calculated) | Weight percentage (observed) | Atomic percentage (calculated) | Atomic percentage (observed) | Weight percentage /Atomic weight |
|----------|-------------------|--------------------------------|------------------------------|--------------------------------|------------------------------|----------------------------------|
| Ba L     | 137.327           | 42.275                         | 50.41                        | 11.766                         | 19.03                        | 0.3078                           |
| Mg K     | 24.305            | 5.611                          | 03.36                        | 8.822                          | 07.15                        | 0.2308                           |
| Ni L     | 58.693            | 4.517                          | 11.00                        | 2.924                          | 09.71                        | 0.0765                           |
| Te L     | 127.60            | 19.640                         | 18.70                        | 5.883                          | 07.60                        | 0.1539                           |
| B K      | 10.811            | 3.328                          | 01.89                        | 11.766                         | 09.06                        | 0.3078                           |
| O K      | 15.999            | 24.626                         | 14.64                        | 58.837                         | 47.44                        | 1.5392                           |
| Total    | 649.670           | 100                            |                              | 100                            |                              | 2.616                            |

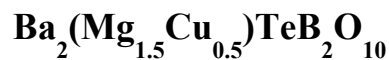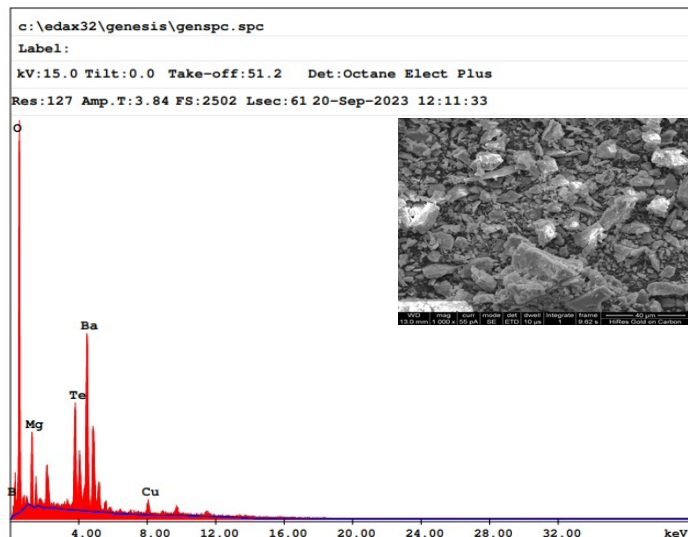

| Elements | Atomic weight (u) | Weight percentage (calculated) | Weight percentage (observed) | Atomic percentage (calculated) | Atomic percentage (observed) | Weight percentage /Atomic weight |
|----------|-------------------|--------------------------------|------------------------------|--------------------------------|------------------------------|----------------------------------|
| Ba L     | 137.327           | 42.118                         | 53.13                        | 11.762                         | 21.65                        | 0.3066                           |
| Mg K     | 24.305            | 5.590                          | 03.61                        | 8.819                          | 08.31                        | 0.2299                           |
| Cu K     | 63.546            | 4.872                          | 07.61                        | 2.938                          | 06.70                        | 0.0766                           |
| Te L     | 127.60            | 19.567                         | 21.00                        | 5.881                          | 09.21                        | 0.1533                           |
| B K      | 10.811            | 3.315                          | 01.73                        | 11.762                         | 08.96                        | 0.3066                           |
| O K      | 15.999            | 24.537                         | 12.91                        | 58.835                         | 45.16                        | 1.5336                           |
| Total    | 652.096           | 100                            |                              | 100                            |                              | 2.6066                           |

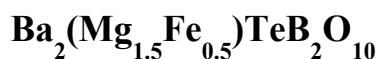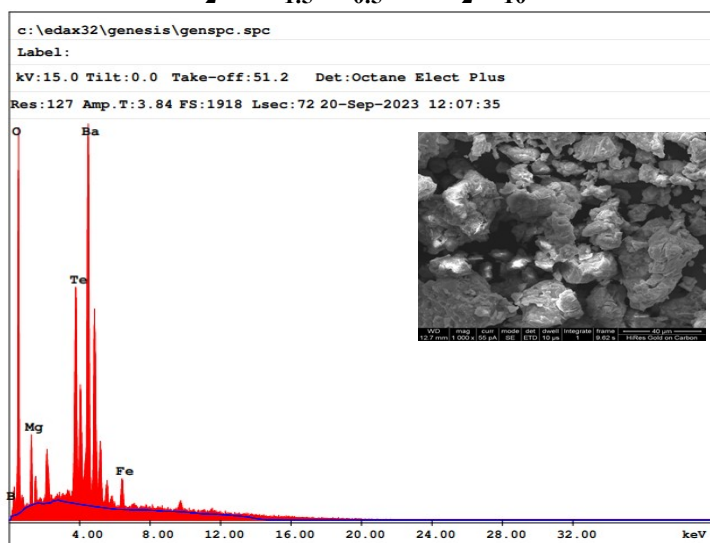

| Elements | Atomic weight (u) | Weight percentage (calculated) | Weight percentage (observed) | Atomic percentage (calculated) | Atomic percentage (observed) | Weight percentage /Atomic weight |
|----------|-------------------|--------------------------------|------------------------------|--------------------------------|------------------------------|----------------------------------|
| Ba L     | 137.327           | 42.368                         | 62.70                        | 11.764                         | 35.98                        | 0.30851                          |
| Mg K     | 24.305            | 05.624                         | 01.83                        | 08.823                         | 05.92                        | 0.23139                          |
| Fe K     | 55.845            | 04.307                         | 04.02                        | 02.940                         | 05.67                        | 0.07712                          |
| Te L     | 127.60            | 19.683                         | 24.09                        | 05.882                         | 14.88                        | 0.15425                          |
| B K      | 10.811            | 03.335                         | 0.54                         | 11.763                         | 03.90                        | 0.30848                          |
| O K      | 15.999            | 24.680                         | 06.83                        | 58.824                         | 33.65                        | 1.54259                          |

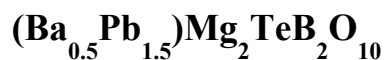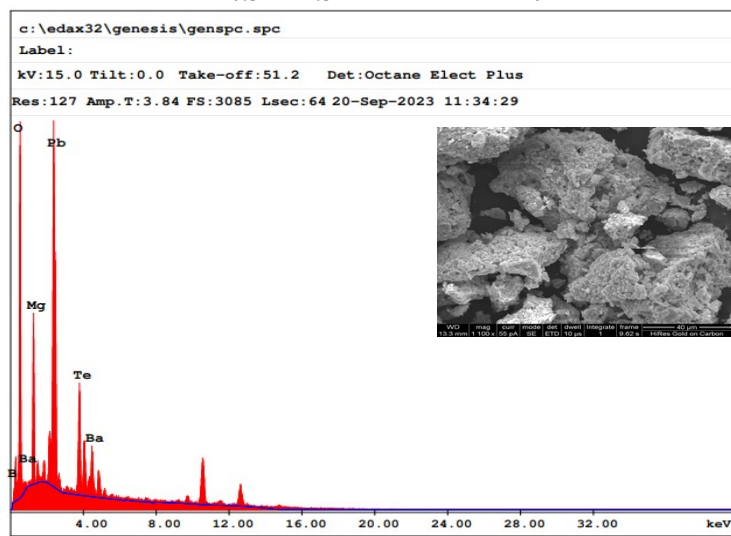

| Elements | Atomic weight (u) | Weight percentage (calculated) | Weight percentage (observed) | Atomic percentage (calculated) | Atomic percentage (observed) | Weight percentage /Atomic weight |
|----------|-------------------|--------------------------------|------------------------------|--------------------------------|------------------------------|----------------------------------|
| Ba L     | 137.327           | 9.313                          | 12.92                        | 02.940                         | 05.10                        | 0.0678                           |
| Pb M     | 207.2             | 42.154                         | 42.36                        | 08.820                         | 11.09                        | 0.2034                           |
| Mg K     | 24.305            | 6.593                          | 05.81                        | 11.761                         | 12.95                        | 0.2712                           |
| Te L     | 127.60            | 17.306                         | 21.27                        | 05.88                          | 09.04                        | 0.1356                           |
| B K      | 10.811            | 2.932                          | 01.24                        | 11.761                         | 06.22                        | 0.2712                           |
| O K      | 15.999            | 21.600                         | 16.40                        | 58.00                          | 55.60                        | 1.3560                           |

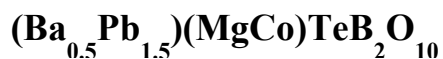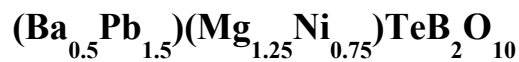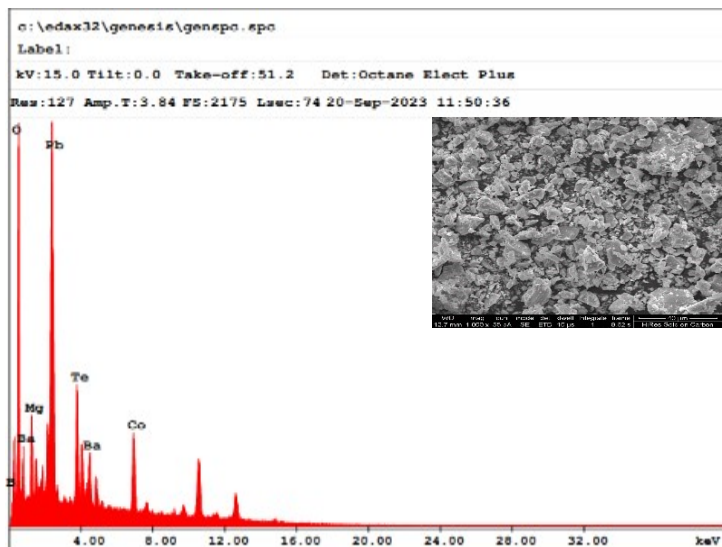

| Elements | Atomic weight (u) | Weight percentage (calculated) | Weight percentage (observed) | Atomic percentage (calculated) | Atomic percentage (observed) | Weight percentage /Atomic weight |
|----------|-------------------|--------------------------------|------------------------------|--------------------------------|------------------------------|----------------------------------|
| Ba L     | 137.327           | 8.895                          | 12.45                        | 2.938                          | 05.26                        | 0.0647                           |
| Pb M     | 207.2             | 40.263                         | 35.73                        | 8.815                          | 10.01                        | 0.1941                           |
| Mg K     | 24.305            | 3.148                          | 02.15                        | 5.881                          | 05.12                        | 0.1295                           |
| Co K     | 58.933            | 7.634                          | 16.82                        | 5.881                          | 16.58                        | 0.1295                           |
| Te L     | 127.60            | 16.530                         | 18.58                        | 5.881                          | 08.45                        | 0.1295                           |
| B K      | 10.811            | 2.801                          | 01.58                        | 11.763                         | 08.49                        | 0.2590                           |
| O K      | 15.999            | 20.726                         | 12.70                        | 58.836                         | 46.09                        | 1.2954                           |
| Total    | 771.913           | 100                            |                              | 100                            |                              | 2.2017                           |

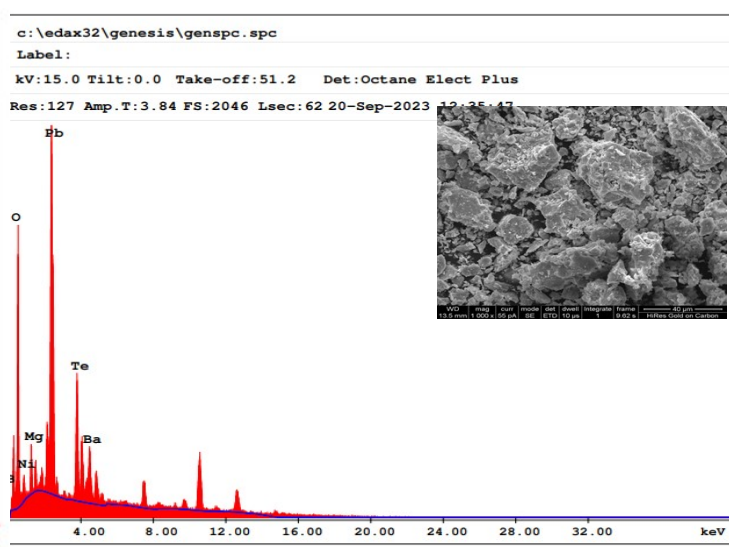

| Elements | Atomic weight (u) | Weight percentage (calculated) | Weight percentage (observed) | Atomic percentage (calculated) | Atomic percentage (observed) | Weight percentage /Atomic weight |
|----------|-------------------|--------------------------------|------------------------------|--------------------------------|------------------------------|----------------------------------|
| Ba L     | 137.327           | 8.998                          | 15.03                        | 2.940                          | 07.33                        | 0.0655                           |
| Pb M     | 207.2             | 40.729                         | 42.93                        | 8.822                          | 13.87                        | 0.1965                           |
| Mg K     | 24.305            | 3.981                          | 01.69                        | 7.349                          | 04.66                        | 0.1637                           |
| Ni K     | 58.693            | 5.768                          | 03.54                        | 4.408                          | 04.03                        | 0.0982                           |
| Te L     | 127.60            | 16.721                         | 23.61                        | 5.881                          | 12.39                        | 0.1310                           |
| B K      | 10.811            | 2.833                          | 01.23                        | 11.763                         | 07.60                        | 0.2620                           |
| O K      | 15.999            | 20.966                         | 11.98                        | 58.833                         | 50.12                        | 1.3104                           |
| Total    | 763.076           | 100                            |                              | 100                            |                              | 2.2273                           |

Figure S2. SEM-EDX spectra of  $\text{Ba}_2(\text{Mg}_{2-x}\text{M}_x)\text{TeB}_2\text{O}_{10}$  ( $M=\text{Zn}, \text{Co}, \text{Ni}, \text{Fe}, \text{Cu}$ ) and  $(\text{Ba}_{0.5}\text{Pb}_{1.5})(\text{Mg}_{2-x}\text{M}_x)\text{TeB}_2\text{O}_{10}$  ( $M=\text{Co}, \text{Ni}, \text{Cu}$ ).



Table S1. Nuclear site group analysis for each atom in A<sub>2</sub>Mg<sub>2</sub>TeB<sub>2</sub>O<sub>10</sub> (A=Ba/Pb)

| Sl. No | Atom    | Wyckoff position | Transformation in irreducible representations |                 |                 |                 |                |                 |                 |                 |
|--------|---------|------------------|-----------------------------------------------|-----------------|-----------------|-----------------|----------------|-----------------|-----------------|-----------------|
|        |         |                  | A <sub>g</sub>                                | B <sub>1g</sub> | B <sub>2g</sub> | B <sub>3g</sub> | A <sub>u</sub> | B <sub>1u</sub> | B <sub>2u</sub> | B <sub>3u</sub> |
| 1      | Ba1/Pb1 | 8f               | 2                                             | 1               | 1               | 2               | 1              | 2               | 2               | 1               |
| 2      | Mg1     | 8e               | 1                                             | 2               | 1               | 2               | 1              | 2               | 1               | 2               |
| 3      | Te1     | 4a               | 0                                             | 0               | 0               | 0               | 1              | 2               | 2               | 1               |
| 4      | B1      | 8f               | 2                                             | 1               | 1               | 2               | 1              | 2               | 2               | 1               |
| 5      | O1      | 8f               | 2                                             | 1               | 1               | 2               | 1              | 2               | 2               | 1               |
| 6      | O2      | 16g              | 3                                             | 3               | 3               | 3               | 3              | 3               | 3               | 3               |
| 7      | O3      | 8f               | 2                                             | 1               | 1               | 2               | 1              | 2               | 2               | 1               |
| 8      | O4      | 8f               | 2                                             | 1               | 1               | 2               | 1              | 2               | 2               | 1               |

From the reported X-ray diffraction data, the structure of A<sub>2</sub>Mg<sub>2</sub>TeB<sub>2</sub>O<sub>10</sub> (A=Ba/Pb) consists of Ba1/Pb1, B1, O1, O3 and O4 atoms occupying 8f Wyckoff position, 8e Wyckoff position is occupied by Mg1, 4a Wyckoff position is occupied by Te1 and 16g Wyckoff position is occupied by O2 atom. The nuclear site group analysis described by Rousseau *et al* for the space group<sup>6</sup> *Cmca*, it gives the point group symmetry for all Wyckoff positions and the transformation in the corresponding irreducible representations. The transformations obtained in irreducible representations with the Wyckoff position of atoms are tabulated in Table S1. The total transformations are as follows:

$$\Gamma(102) = 14 A_g + 10 A_u + 10 B_{1g} + 17 B_{1u} + 9 B_{2g} + 16 B_{2u} + 15 B_{3g} + 11 B_{3u}$$

$$\Gamma_{\text{Raman}}(48) = 14A_g + 10B_{1g} + 9B_{2g} + 15B_{3g};$$

$$\Gamma_{\text{IR}}(41) = 16B_{1u} + 15B_{2u} + 10B_{3u};$$

$$\text{Acoustic} = B_{1u} + B_{2u} + B_{3u};$$

$$\text{Silent} = 10A_u.$$

Some of the expected Raman bands were not observed may be due to very less intensity and overlapping with modes due to accidental degeneracy.<sup>7</sup> The molecular polarizability could be obtained by the Shannon's additive rule.<sup>8</sup>

$$\alpha(\text{Ba}_{2-x}\text{Pb}_x)\text{Mg}_2\text{TeB}_2\text{O}_{10} = (2-x)\alpha(\text{Ba}^{2+}) + (x)\alpha(\text{Pb}^{2+}) + (2)\alpha(\text{Mg}^{2+}) + \alpha(\text{Te}^{6+}) + 2\alpha(\text{B}^{3+}) + 10\alpha(\text{O}^{2-})$$

The ion dielectric polarizabilities value for  $\alpha$  ( $\text{Ba}^{2+}$ ) = 6.40 Å<sup>3</sup>;  $\alpha$  ( $\text{Pb}^{2+}$ ) = 6.58 Å<sup>3</sup>;  $\alpha$  ( $\text{Te}^{6+}$ ) = 5.23 Å<sup>3</sup>;  $\alpha$  ( $\text{Mg}^{2+}$ ) = 1.32 Å<sup>3</sup>;  $\alpha$  ( $\text{B}^{3+}$ ) = 0.05 Å<sup>3</sup>;  $\alpha$  ( $\text{O}^{2-}$ ) = 2.01 Å<sup>3</sup>.

Table S2. The observed Raman vibrational bands correspond to  $\text{BaO}_{11}$ ,  $\text{MgO}_6$ ,  $\text{MO}_6$  (M – Zn, Co, Ni, Cu, Fe, In),  $\text{TeO}_6$ ,  $\text{BO}_3$  polyhedra.

| Name of the compound                                                                                 |                                                               | Ba-O bond Vibration (cm <sup>-1</sup> ) | Pb-O bond Vibration (cm <sup>-1</sup> ) |
|------------------------------------------------------------------------------------------------------|---------------------------------------------------------------|-----------------------------------------|-----------------------------------------|
| $\text{Ba}_2\text{Mg}_2\text{TeB}_2\text{O}_{10}$                                                    | $\text{Ba}^{2+}\text{O}_{11}$                                 | 764                                     | -----                                   |
| $\text{Ba}_2(\text{Mg}_{1.25}\text{Zn}_{0.75})\text{TeB}_2\text{O}_{10}$                             |                                                               | 769                                     | -----                                   |
| $\text{Ba}_2(\text{MgCo})\text{TeB}_2\text{O}_{10}$                                                  |                                                               | 770                                     | -----                                   |
| $\text{Ba}_2(\text{Mg}_{1.5}\text{Ni}_{0.5})\text{TeB}_2\text{O}_{10}$                               |                                                               | 768                                     | -----                                   |
| $\text{Ba}_2(\text{Mg}_{1.5}\text{Cu}_{0.5})\text{TeB}_2\text{O}_{10}$                               |                                                               | 767                                     | -----                                   |
| $\text{Ba}_2(\text{Mg}_{1.5}\text{Fe}_{0.5})\text{TeB}_2\text{O}_{10}$                               |                                                               | 724                                     | -----                                   |
| $\text{Ba}_2(\text{Mg}_{1.5}\text{In}_{0.5})(\text{Te}_{0.5}\text{Sb}_{0.5})\text{B}_2\text{O}_{10}$ |                                                               | 763                                     | -----                                   |
| $(\text{Ba}_{0.5}\text{Pb}_{1.5})\text{Mg}_2\text{TeB}_2\text{O}_{10}$                               | $\text{Pb}^{2+}\text{O}_5$<br>&<br>$\text{Ba}^{2+}\text{O}_5$ | 144                                     | 293                                     |
| $(\text{Ba}_{0.5}\text{Pb}_{1.5})(\text{MgCo})\text{TeB}_2\text{O}_{10}$                             |                                                               | 140                                     | 286                                     |
| $(\text{Ba}_{0.5}\text{Pb}_{1.5})(\text{Mg}_{1.25}\text{Ni}_{0.75})\text{TeB}_2\text{O}_{10}$        |                                                               | 145                                     | 291                                     |
| $(\text{Ba}_{0.5}\text{Pb}_{1.5})(\text{Mg}_{1.75}\text{Cu}_{0.25})\text{TeB}_2\text{O}_{10}$        |                                                               | 144                                     | 290                                     |

| Name of the compound                                                                                 |                            | Symmetric stretching (cm <sup>-1</sup> ) | Asymmetric stretching (cm <sup>-1</sup> ) | Bending mode (cm <sup>-1</sup> ) |
|------------------------------------------------------------------------------------------------------|----------------------------|------------------------------------------|-------------------------------------------|----------------------------------|
| $\text{Ba}_2\text{Mg}_2\text{TeB}_2\text{O}_{10}$                                                    | $\text{Mg}^{2+}\text{O}_6$ | 461                                      | 679                                       | 222                              |
| $\text{Ba}_2(\text{Mg}_{1.25}\text{Zn}_{0.75})\text{TeB}_2\text{O}_{10}$                             |                            | 460                                      | 678                                       | 217                              |
| $\text{Ba}_2(\text{MgCo})\text{TeB}_2\text{O}_{10}$                                                  |                            | 458                                      | 673                                       | 212                              |
| $\text{Ba}_2(\text{Mg}_{1.5}\text{Ni}_{0.5})\text{TeB}_2\text{O}_{10}$                               |                            | 461                                      | 678                                       | 211                              |
| $\text{Ba}_2(\text{Mg}_{1.5}\text{Cu}_{0.5})\text{TeB}_2\text{O}_{10}$                               |                            | 460                                      | 679                                       | 219                              |
| $\text{Ba}_2(\text{Mg}_{1.5}\text{Fe}_{0.5})\text{TeB}_2\text{O}_{10}$                               |                            | 458                                      | 678                                       | 216                              |
| $\text{Ba}_2(\text{Mg}_{1.5}\text{In}_{0.5})(\text{Te}_{0.5}\text{Sb}_{0.5})\text{B}_2\text{O}_{10}$ |                            | 456                                      | 677                                       | 217                              |
| $(\text{Ba}_{0.5}\text{Pb}_{1.5})\text{Mg}_2\text{TeB}_2\text{O}_{10}$                               |                            | 451                                      | 683                                       | 220                              |
| $(\text{Ba}_{0.5}\text{Pb}_{1.5})(\text{MgCo})\text{TeB}_2\text{O}_{10}$                             |                            | 440                                      | 670                                       | 204                              |
| $(\text{Ba}_{0.5}\text{Pb}_{1.5})(\text{Mg}_{1.25}\text{Ni}_{0.75})\text{TeB}_2\text{O}_{10}$        |                            | 448                                      | 680                                       | 219                              |
| $(\text{Ba}_{0.5}\text{Pb}_{1.5})(\text{Mg}_{1.75}\text{Cu}_{0.25})\text{TeB}_2\text{O}_{10}$        |                            | 449                                      | 682                                       | 217                              |

| Name of the compound                                                                          |                            | Symmetric stretching (cm <sup>-1</sup> ) | Asymmetric stretching (cm <sup>-1</sup> ) | Bending mode (cm <sup>-1</sup> ) |
|-----------------------------------------------------------------------------------------------|----------------------------|------------------------------------------|-------------------------------------------|----------------------------------|
| $\text{Ba}_2(\text{Mg}_{1.25}\text{Zn}_{0.75})\text{TeB}_2\text{O}_{10}$                      | $\text{Zn}^{2+}\text{O}_6$ | 398                                      | 239                                       | 344                              |
| $\text{Ba}_2(\text{MgCo})\text{TeB}_2\text{O}_{10}$                                           | $\text{Co}^{2+}\text{O}_6$ | 402                                      | 241                                       | 345                              |
| $(\text{Ba}_{0.5}\text{Pb}_{1.5})(\text{MgCo})\text{TeB}_2\text{O}_{10}$                      | $\text{Co}^{2+}\text{O}_6$ | 411                                      | 243                                       | 357                              |
| $\text{Ba}_2(\text{Mg}_{1.5}\text{Ni}_{0.5})\text{TeB}_2\text{O}_{10}$                        | $\text{Ni}^{2+}\text{O}_6$ | 400                                      | 241                                       | 348                              |
| $(\text{Ba}_{0.5}\text{Pb}_{1.5})(\text{Mg}_{1.25}\text{Ni}_{0.75})\text{TeB}_2\text{O}_{10}$ | $\text{Ni}^{2+}\text{O}_6$ | 408                                      | 243                                       | 338                              |

|                                                                                                      |                            |     |     |     |
|------------------------------------------------------------------------------------------------------|----------------------------|-----|-----|-----|
| $\text{Ba}_2(\text{Mg}_{1.5}\text{Cu}_{0.5})\text{TeB}_2\text{O}_{10}$                               | $\text{Cu}^{2+}\text{O}_6$ | 398 | 220 | 307 |
| $(\text{Ba}_{0.5}\text{Pb}_{1.5})(\text{Mg}_{1.75}\text{Cu}_{0.25})\text{TeB}_2\text{O}_{10}$        | $\text{Cu}^{2+}\text{O}_6$ | 414 | 244 | 335 |
| $\text{Ba}_2(\text{Mg}_{1.5}\text{Fe}_{0.5})\text{TeB}_2\text{O}_{10}$                               | $\text{Fe}^{2+}\text{O}_6$ | 524 | 345 | 303 |
| $\text{Ba}_2(\text{Mg}_{1.5}\text{In}_{0.5})(\text{Te}_{0.5}\text{Sb}_{0.5})\text{B}_2\text{O}_{10}$ | $\text{In}^{3+}\text{O}_6$ | 568 | 344 | 301 |

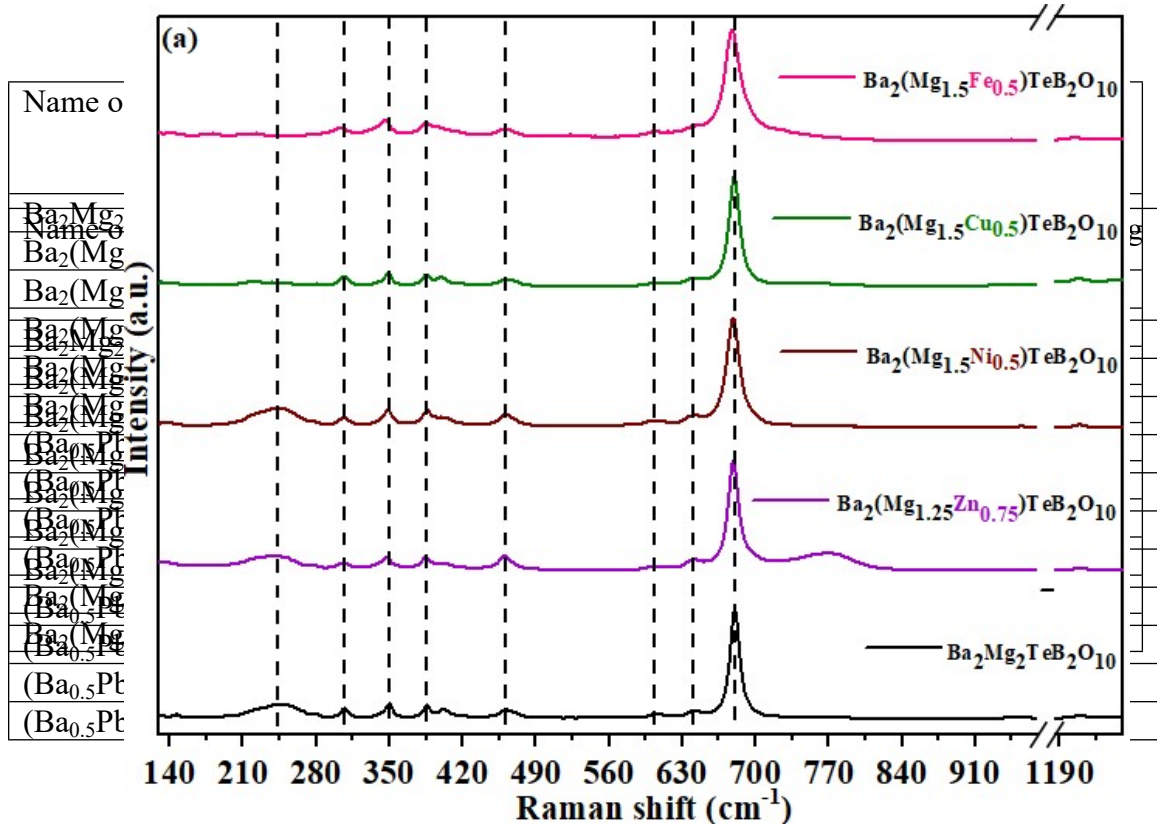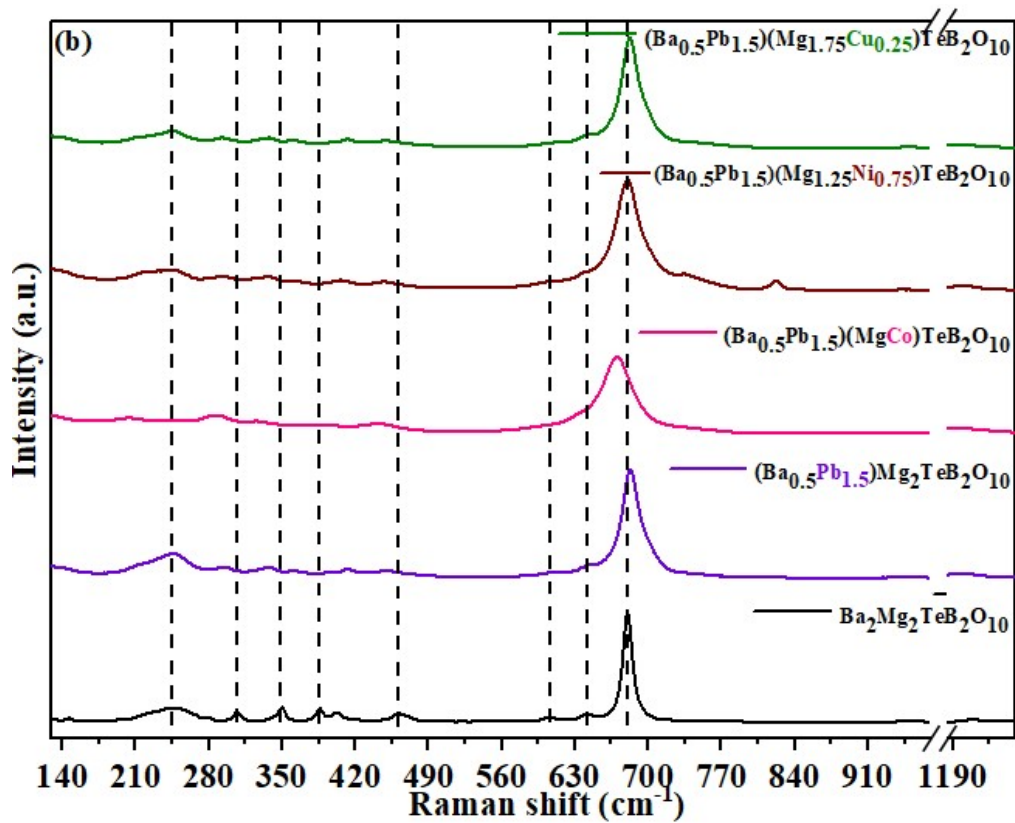

Figure S3. Raman spectra of (a)  $\text{Ba}_2(\text{Mg}_{2-x}\text{M}_x)\text{TeB}_2\text{O}_{10}$  ( $\text{M}=\text{Zn, Ni, Cu, Fe}$ ) and (b)  $(\text{Ba}_{0.5}\text{Pb}_{1.5})(\text{Mg}_{2-x}\text{M}_x)\text{TeB}_2\text{O}_{10}$  ( $\text{M}=\text{Co, Ni, Cu}$ ).

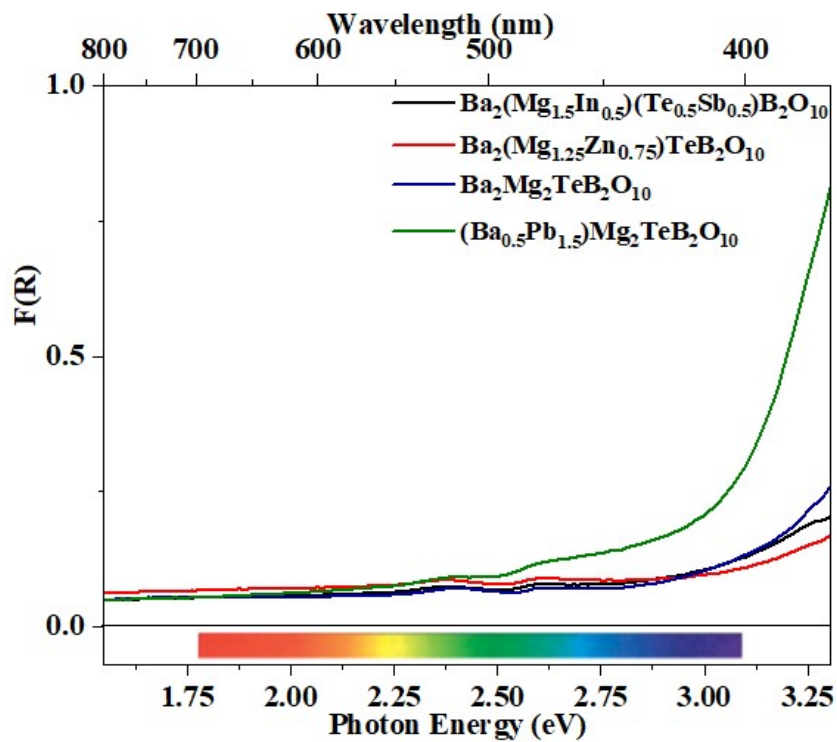

Figure S4. Optical absorption spectra for the prepared white-colored telluroborates.

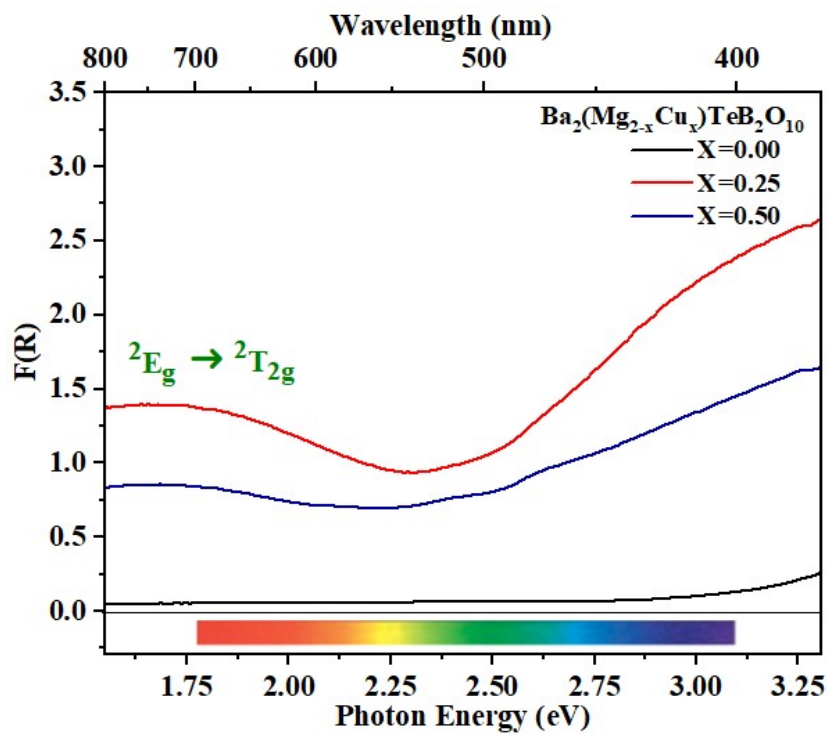

| Name of the compound                                                   | Band gap (eV) from Tauc plot |
|------------------------------------------------------------------------|------------------------------|
| $\text{Ba}_2(\text{Mg}_{1.5}\text{Cu}_{0.5})\text{TeB}_2\text{O}_{10}$ | 1.91 eV                      |

Figure S5. Optical absorption spectra for the  $\text{Ba}_2(\text{Mg}_{2-x}\text{Cu}_x)\text{TeB}_2\text{O}_{10}$  ( $0 < x \leq 0.5$ ).

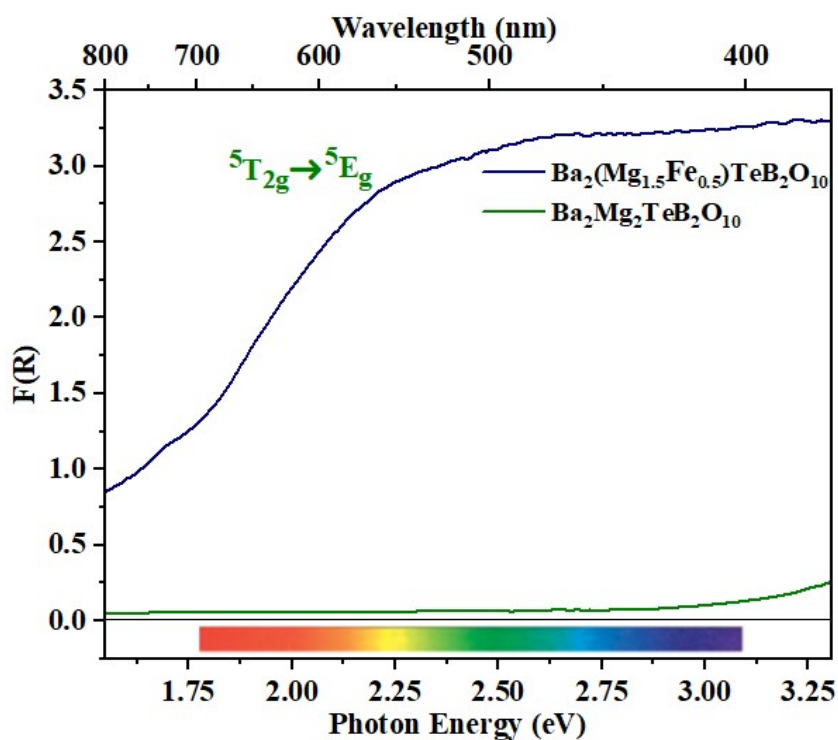

Figure S6. Optical absorption spectra for the  $\text{Ba}_2(\text{Mg}_{2-x}\text{Fe}_x)\text{TeB}_2\text{O}_{10}$  ( $0 < x \leq 0.5$ ).

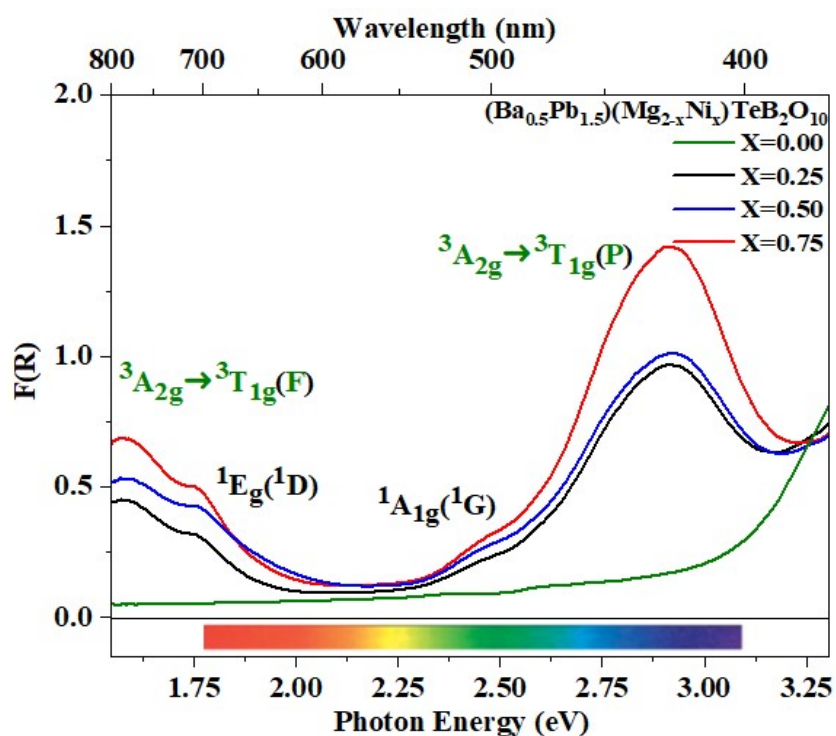

Figure S7. Optical absorption spectra for the  $(\text{Ba}_{0.5}\text{Pb}_{1.5})(\text{Mg}_{2-x}\text{Ni}_x)\text{TeB}_2\text{O}_{10}$  ( $0 < x \leq 0.75$ ).

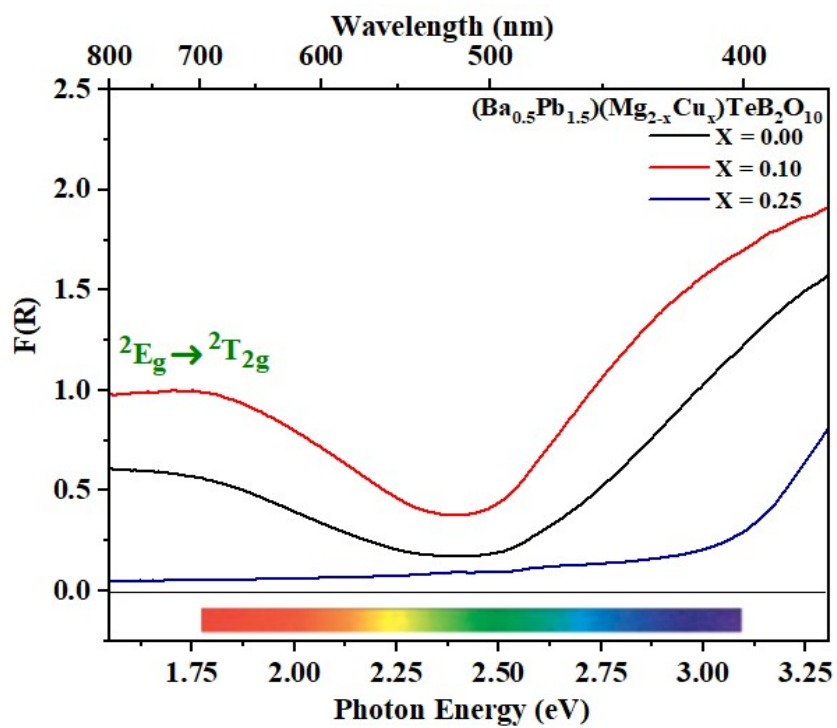

Figure S8. Optical absorption spectra for the  $(\text{Ba}_{0.5}\text{Pb}_{1.5})(\text{Mg}_{2-x}\text{Cu}_x)\text{TeB}_2\text{O}_{10}$  ( $0 < x \leq 0.25$ ).

Table S3. Colors of  $\text{Ba}_2(\text{Mg}_{2-x}\text{M}^{\text{II}}_x)\text{TeB}_2\text{O}_{10}$  ( $\text{M}^{\text{II}} = \text{Fe}, \text{Co}, \text{Ni}, \text{and Cu}$ ) and  $(\text{Ba}_{0.5}\text{Pb}_{1.5})(\text{Mg}_{2-x}\text{M}^{\text{II}}_x)\text{TeB}_2\text{O}_{10}$  ( $\text{M}^{\text{II}} = \text{Co}, \text{Ni}, \text{and Cu}$ ) under Daylight.

| Sl. No | Compounds                                                                                     | Ligand-field transitions (nm/eV) |                        | Assignment*                                                                   | Color                                                                                 |
|--------|-----------------------------------------------------------------------------------------------|----------------------------------|------------------------|-------------------------------------------------------------------------------|---------------------------------------------------------------------------------------|
| 1      | $\text{Ba}_2(\text{Mg}_{1.5}\text{Fe}_{0.5})\text{TeB}_2\text{O}_{10}$                        | 551/2.25                         | $\text{Fe}^{2+}(3d^6)$ | ${}^5\text{T}_{2g} \rightarrow {}^5\text{E}_g$                                |    |
| 2      | $\text{Ba}_2(\text{MgCo})\text{TeB}_2\text{O}_{10}$                                           | 546/2.27                         | $\text{Co}^{2+}(3d^7)$ | ${}^4\text{T}_{1g} \rightarrow {}^4\text{T}_{1g}({}^4\text{P})$               |    |
|        |                                                                                               | 742/1.67                         |                        | ${}^4\text{T}_{1g} \rightarrow {}^4\text{A}_{2g}({}^4\text{F})$               |                                                                                       |
| 3      | $\text{Ba}_2(\text{Mg}_{1.5}\text{Ni}_{0.5})\text{TeB}_2\text{O}_{10}$                        | 439/2.82                         | $\text{Ni}^{2+}(3d^8)$ | ${}^3\text{A}_{2g}({}^3\text{F}) \rightarrow {}^3\text{T}_{1g}({}^3\text{P})$ |    |
|        |                                                                                               | 815/1.52                         |                        | ${}^3\text{A}_{2g}({}^3\text{F}) \rightarrow {}^3\text{T}_{1g}({}^3\text{F})$ |                                                                                       |
| 4      | $\text{Ba}_2(\text{Mg}_{1.5}\text{Cu}_{0.5})\text{TeB}_2\text{O}_{10}$                        | 708/1.75                         | $\text{Cu}^{2+}(3d^9)$ | ${}^2\text{E}_g \rightarrow {}^2\text{T}_{2g}$                                |  |
| 5      | $(\text{Ba}_{0.5}\text{Pb}_{1.5})(\text{MgCo})\text{TeB}_2\text{O}_{10}$                      | 541/2.29                         | $\text{Co}^{2+}(3d^7)$ | ${}^4\text{T}_{1g} \rightarrow {}^4\text{T}_{1g}({}^4\text{P})$               |  |
|        |                                                                                               | 689/1.80                         |                        | ${}^4\text{T}_{1g} \rightarrow {}^4\text{A}_{2g}({}^4\text{F})$               |                                                                                       |
| 6      | $(\text{Ba}_{0.5}\text{Pb}_{1.5})(\text{Mg}_{1.25}\text{Ni}_{0.75})\text{TeB}_2\text{O}_{10}$ | 426/2.91                         | $\text{Ni}^{2+}(3d^8)$ | ${}^3\text{A}_{2g}({}^3\text{F}) \rightarrow {}^3\text{T}_{1g}({}^3\text{P})$ |  |
|        |                                                                                               | 789/1.57                         |                        | ${}^3\text{A}_{2g}({}^3\text{F}) \rightarrow {}^3\text{T}_{1g}({}^3\text{F})$ |                                                                                       |
| 7      | $(\text{Ba}_{0.5}\text{Pb}_{1.5})(\text{Mg}_{1.75}\text{Cu}_{0.25})\text{TeB}_2\text{O}_{10}$ | 700/1.77                         | $\text{Cu}^{2+}(3d^9)$ | ${}^2\text{E}_g \rightarrow {}^2\text{T}_{2g}$                                |  |

$(\text{Ba}_{0.5}\text{Pb}_{1.5})(\text{Mg}_{2-x}\text{M}^{\text{II}}_x)\text{TeB}_2\text{O}_{10}$  ( $\text{M}^{\text{II}} = \text{Co}, \text{Ni}, \text{and Cu}$ ) under Daylight.

\*Ligand-field transitions, the assignments have been made for octahedral  $\text{M}^{\text{II}}\text{O}_6$  chromophores given in refs <sup>9-13</sup>



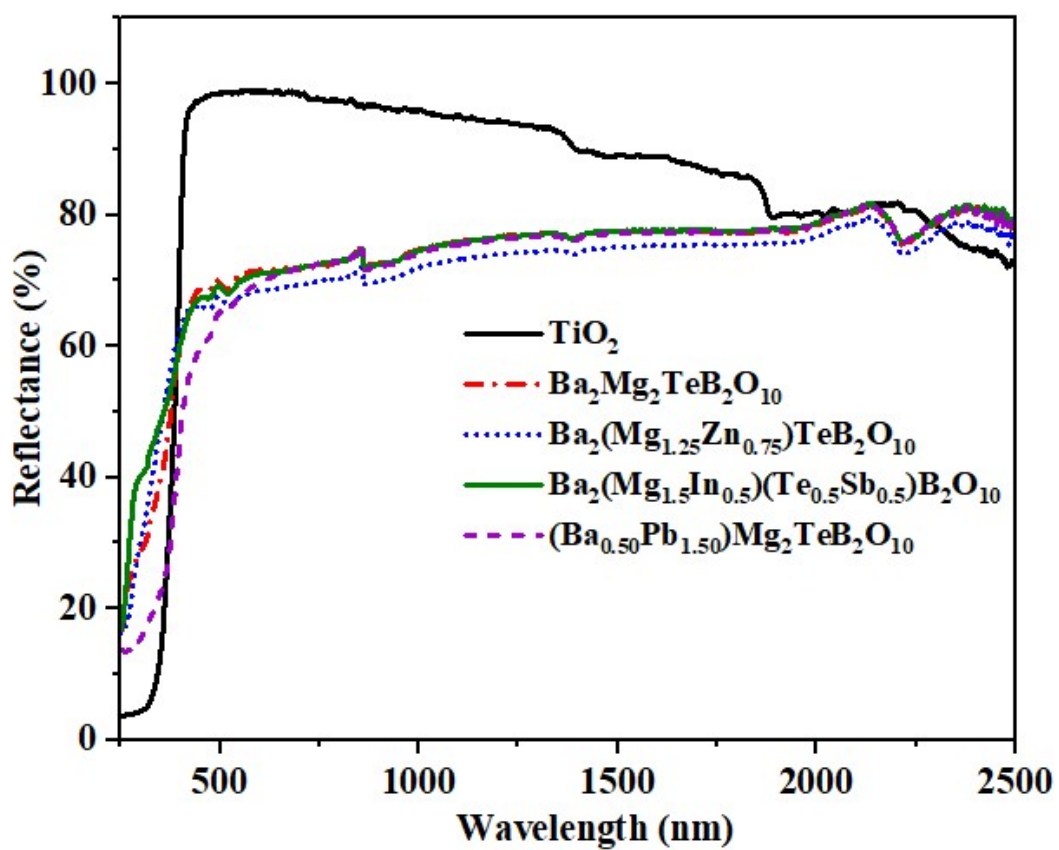

Figure S9. NIR reflectivity of the prepared white-colored telluroborates.



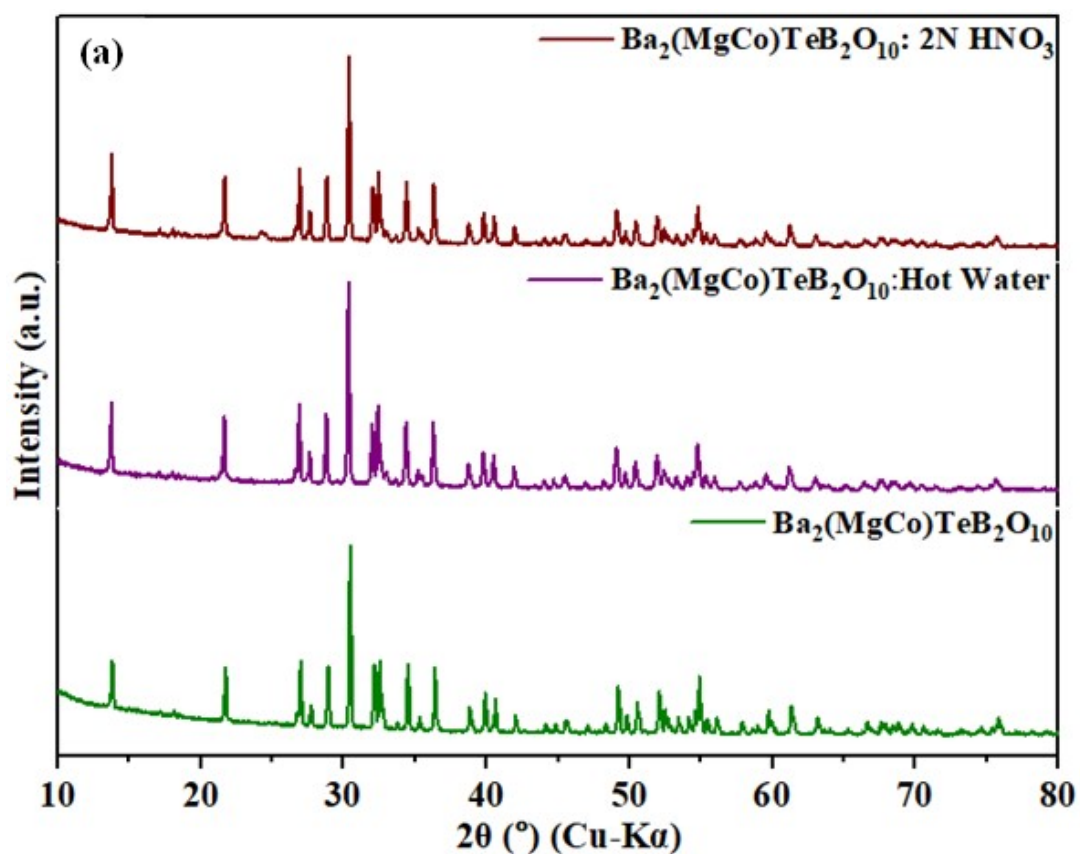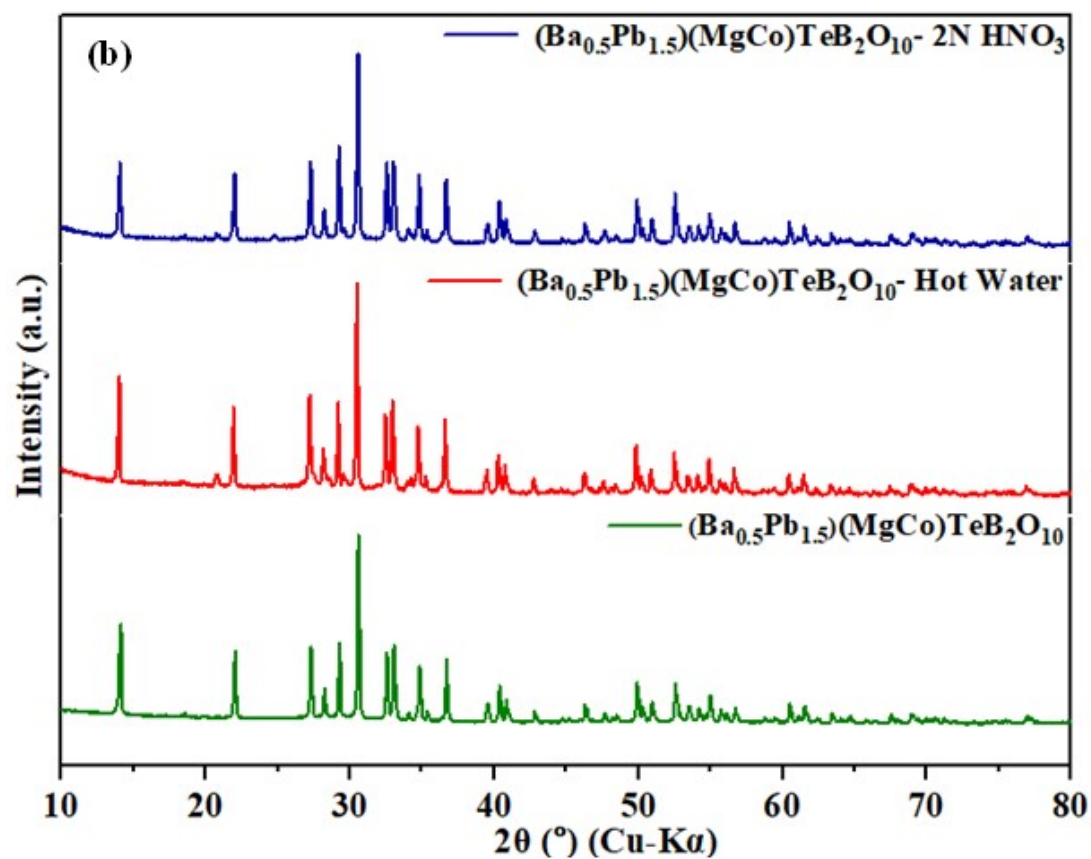

$(\text{Ba}_{0.5}\text{Pb}_{1.5})(\text{MgCo})\text{TeB}_2\text{O}_{10}$  after acid (2N  $\text{HNO}_3$  solution) and hot water (24 h) treatment.

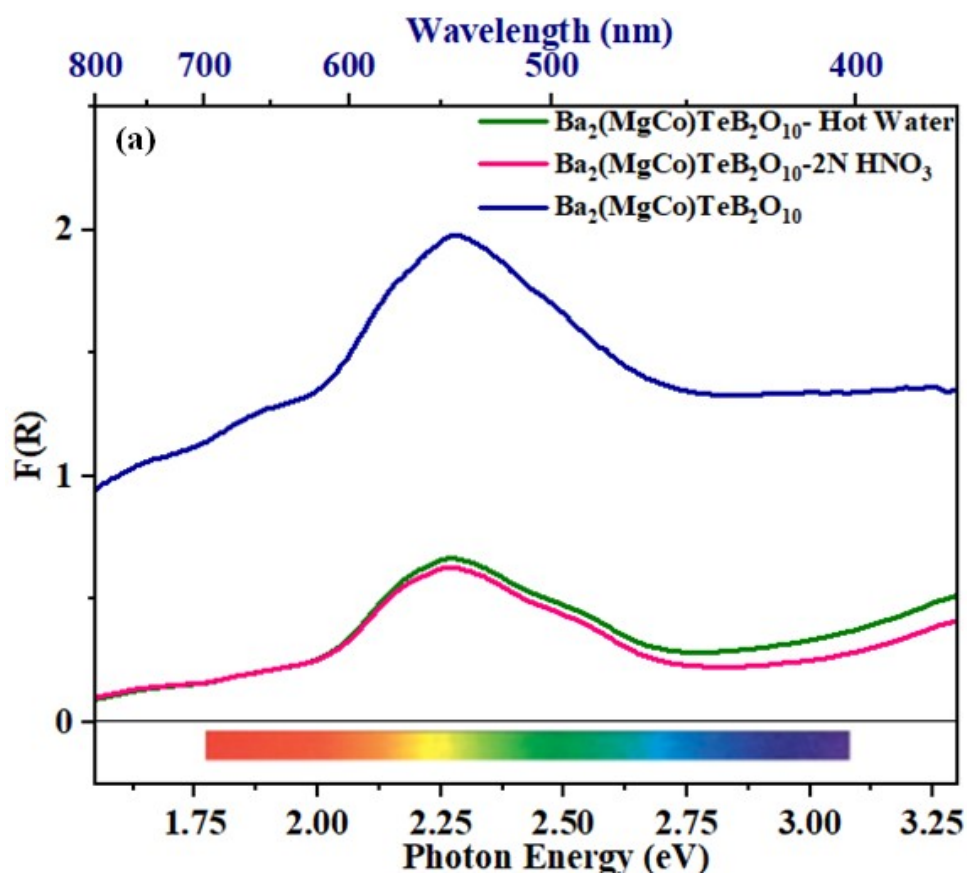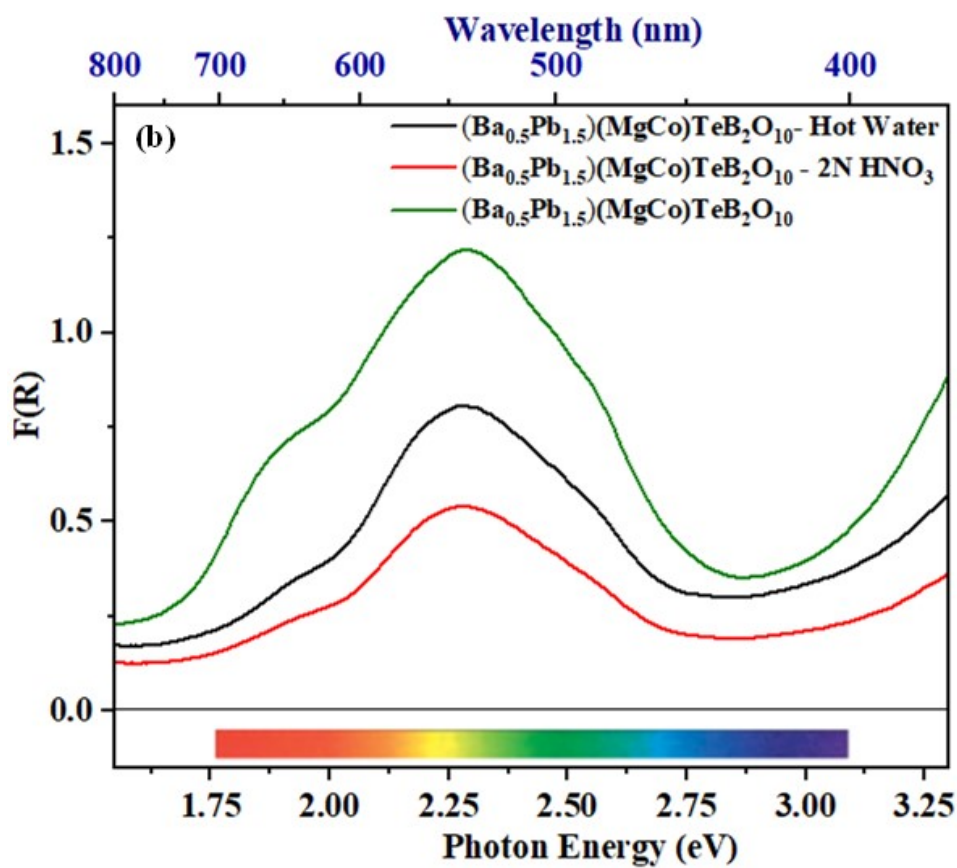

Figure S11. UV-Vis Spectra for acid and hot water stability of  $\text{Ba}_2(\text{MgCo})\text{TeB}_2\text{O}_{10}$  and  $(\text{Ba}_{0.5}\text{Pb}_{1.5})(\text{MgCo})\text{TeB}_2\text{O}_{10}$  after acid and hot water treatment.

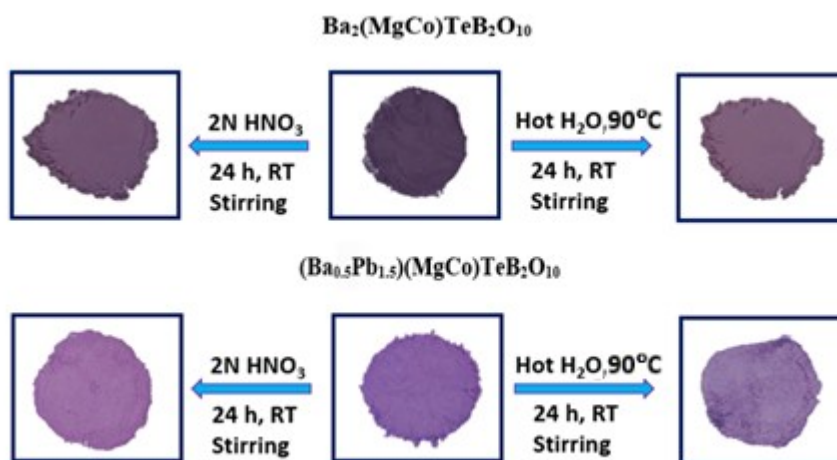

Figure S12. Color of the  $(\text{Ba}_{2-x}\text{Pb}_x)(\text{MgCo})\text{TeB}_2\text{O}_{10}$  before and after acid treatment, hot water stability.

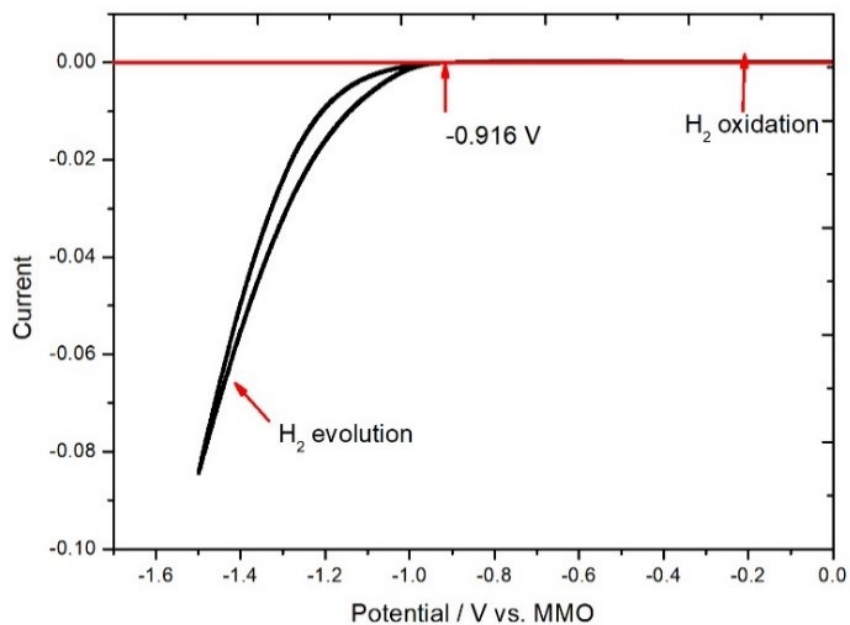

Figure S13. Calibration of mercury/mercury oxide (Hg/HgO) electrode with respect to reversible hydrogen electrode (RHE) in 0.5 M KOH at 10 mV S<sup>-1</sup>.

Therefore, we have for 0.5 M KOH:

$$E_{\text{RHE}} = E_{\text{Hg/HgO}} + 0.916 \text{ V}$$

The reference electrode (Hg/HgO) used in alkaline medium were calibrated with respect to reversible hydrogen electrode using large area Pt foil as a working and counter electrode. High purity hydrogen gas was purged in the respective solutions for at least 45 min before the experiments and there after a constant overhead purge was maintained during the measurements.<sup>14</sup>

Table S4. The comparison of  $(\text{Ba}_{0.5}\text{Pb}_{1.5})(\text{MgCo})\text{TeB}_2\text{O}_{10}$  electrocatalyst with reported cobalt substituted metal oxide towards OER.

| SI No | Catalyst for OER                                                         | Electrolyte Medium | Substrate         | Over potential $\eta$ [V] @ 10 $\text{mA} \cdot \text{cm}^{-2}$ | Tafel slope [mV $\text{dec}^{-1}$ ] | Turn over frequency (TOF) $\text{S}^{-1}$ | Faradaic efficiency (%) | Reference                                                            |
|-------|--------------------------------------------------------------------------|--------------------|-------------------|-----------------------------------------------------------------|-------------------------------------|-------------------------------------------|-------------------------|----------------------------------------------------------------------|
| 1.    | $\text{IrO}_2$                                                           | 1 M KOH            | Glassy Carbon     | 0.338                                                           | 47                                  | 0.01 @300 mV                              | 100                     | <i>Nat. Commun.</i> <b>2014</b> , 5, 4477.                           |
| 2.    | c - $\text{Co}_3\text{O}_4$                                              | 1 M KOH            | Glassy Carbon     | 0.440                                                           | 53                                  | 0.01 @400 mV                              | -                       | <i>ACS Appl. Energy Mater.</i> <b>2020</b> , 3(6), 5439–5447.        |
| 3.    | $\text{NiCo}_2\text{O}_4$                                                | 0.1 M KOH          | Glassy Carbon     | 0.471                                                           | 161                                 | -                                         | 100                     | Lee, D. U.; et al., <i>J.Mater.Chem.</i> <b>2013</b> , 1, 4754-4762. |
| 4.    | Nanowire $\text{MnCo}_2\text{O}_4$                                       | 1 M KOH            | Carbon Cloth      | 0.342                                                           | 115                                 | -                                         | -                       | <i>Adv. Funct. Mater.</i> <b>2022</b> , 32 (11), 2107179.            |
| 5.    | $\text{CoFe}_2\text{O}_4$                                                | 1 M KOH            | Carbon Paper      | 0.477                                                           | 71                                  | 0.000187 @300 mV                          | -                       | <i>ACS Appl. Mater. Interfaces</i> <b>2017</b> , 9, 13132.           |
| 6.    | $\text{CoCr}_2\text{O}_4$                                                | 1 M KOH            | RDE Glassy Carbon | 0.326                                                           | 51                                  | 0.03141 @326 mV                           | -                       | <i>Small.</i> <b>2016</b> , 12, 2866– 2871.                          |
| 7.    | CoBO NPs                                                                 | 1 M KOH            | Glassy Carbon     | 0.359                                                           | 57                                  | 0.0076 @350 mV                            | -                       | <i>Int. J. Hydrogen Energy.</i> <b>2018</b> , 43, 6138–6149.         |
|       | FeBO NPs                                                                 |                    |                   | 0.390                                                           | 59                                  | 0.0020 @350 mV                            |                         |                                                                      |
|       | CoFeBO NPs                                                               |                    |                   | 0.263                                                           | 39                                  | 0.1029 @350 mV                            |                         |                                                                      |
| 8.    | $(\text{Ba}_{0.5}\text{Pb}_{1.5})(\text{MgCo})\text{TeB}_2\text{O}_{10}$ | 0.5 M KOH          | Glassy Carbon     | 0.479                                                           | 73                                  | 4.673 @479 mV                             | 96                      | This work                                                            |

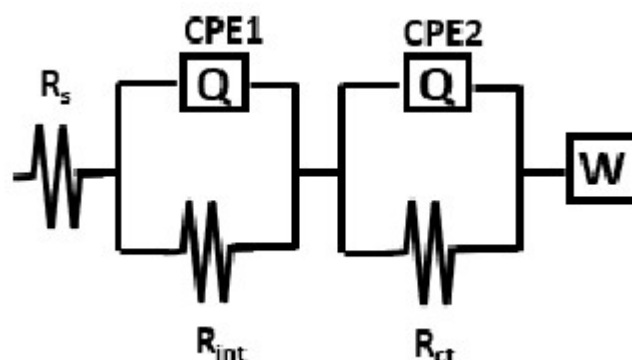

| Electrocatalyst                           | Solution resistance<br>$R_s$ ( $\Omega$ ) | Interfacial contact resistance<br>$R_{int}$ ( $\Omega$ ) | Charge transfer resistance<br>$R_{ct}$ ( $\Omega$ ) | Total resistance<br>( $\Omega$ ) |
|-------------------------------------------|-------------------------------------------|----------------------------------------------------------|-----------------------------------------------------|----------------------------------|
| $C_{(Ba_{0.5}Pb_{1.5})(MgCo)TeB_2O_{10}}$ | 21.93                                     | 25.9                                                     | 94.08                                               | 141.91                           |

This equivalent electrical circuit will try to explain the OER process<sup>15</sup>

- ❖ The  $R_s$  (solution resistance) which has contribution from electrode and electrolyte.
- ❖ The CPE1 (constant phase angle element) &  $R_{int}$  (interfacial contact resistance) denotes internal double layer polarization and corresponding resistance of the polymeric film on the surface of the electrode.
- ❖ The CPE2 with  $R_{ct}$  (charge transfer resistance) was related to faradaic charge transfer resistance was added in the model.
- ❖ Warburg (W) element due to diffusion of electroactive ion at the electrode and electrolyte interface.

Figure S14. The observed equivalent circuit in the electrochemical impedance spectroscopy.



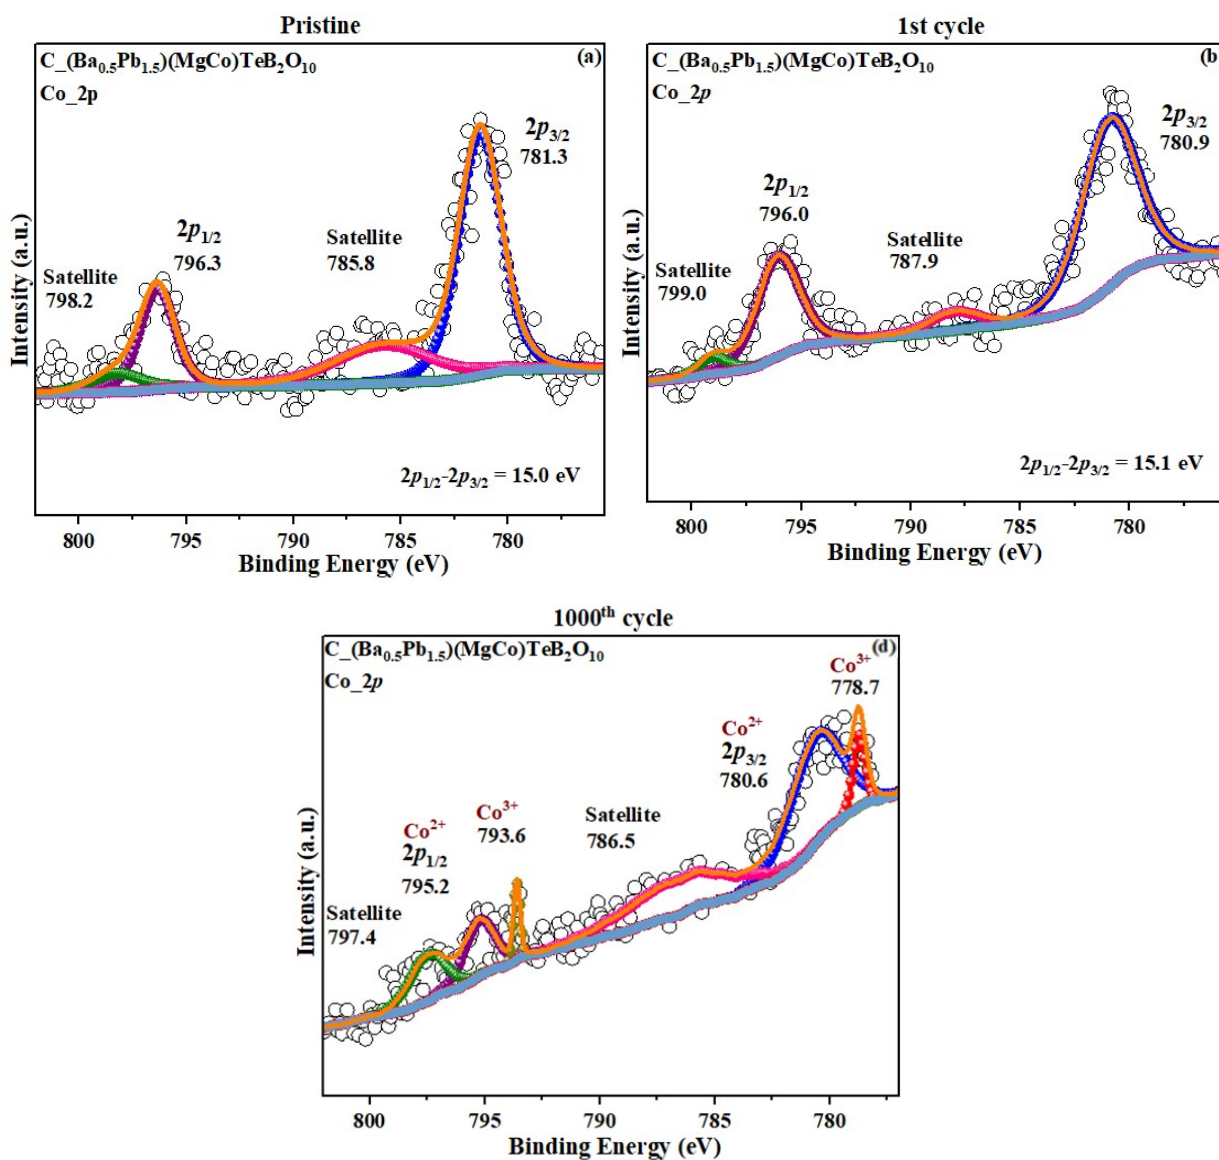

Figure S15. XPS spectra for Co 2p spectra of  $C_{-}(Ba_{0.5}Pb_{1.5})(MgCo)TeB_2O_{10}$  for (a) pristine, (b) 1<sup>st</sup> cycle (c) 500<sup>th</sup> cycle, (d) 1000<sup>th</sup> cycle of cyclic voltammetry scan of the electrocatalyst in 0.5M KOH in the faradaic region.

Table S5. Binding energies of Co 2p peaks in the XPS spectra of

| Sample Name           | Co <sup>3+</sup> 2p <sub>3/2</sub><br>(eV) | Co <sup>3+</sup> 2p <sub>1/2</sub><br>(eV) | Co <sup>2+</sup> 2p <sub>3/2</sub><br>(eV) | Co <sup>2+</sup> 2p <sub>1/2</sub><br>(eV) | Satellite   |
|-----------------------|--------------------------------------------|--------------------------------------------|--------------------------------------------|--------------------------------------------|-------------|
| Pristine              | ---                                        | ---                                        | 781.3                                      | 796.3                                      | 785.8/798.2 |
| 1 <sup>st</sup> CV    | ---                                        | ---                                        | 780.9                                      | 796.0                                      | 787.9/799.0 |
| 1000 <sup>nd</sup> CV | 778.7                                      | 793.6                                      | 780.6                                      | 795.2                                      | 786.5/797.4 |

C<sub>2</sub>(Ba<sub>0.5</sub>Pb<sub>1.5</sub>)(MgCo)TeB<sub>2</sub>O<sub>10</sub><sup>16</sup>

| Sample Name           | Co <sup>3+</sup> (%) | Co <sup>2+</sup> (%) | Co <sup>3+</sup> /Co <sup>2+</sup> |
|-----------------------|----------------------|----------------------|------------------------------------|
| 1000 <sup>nd</sup> CV | 06.20                | 39.14                | 0.158                              |

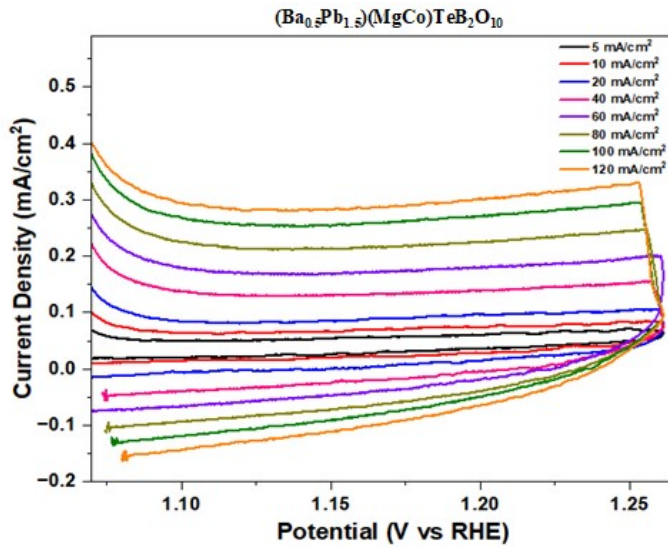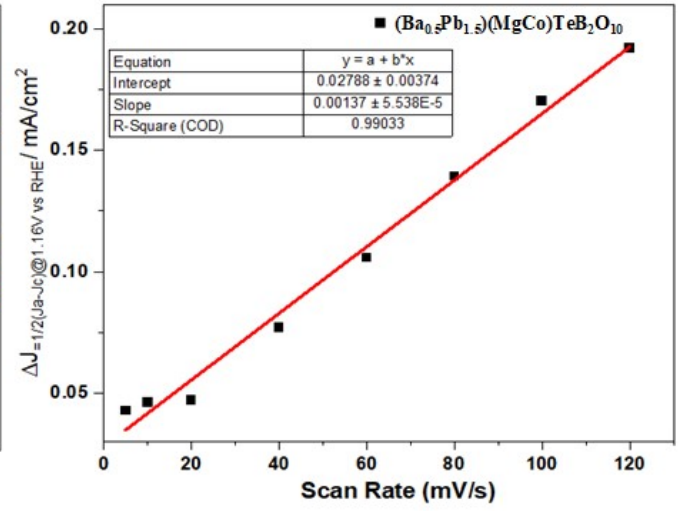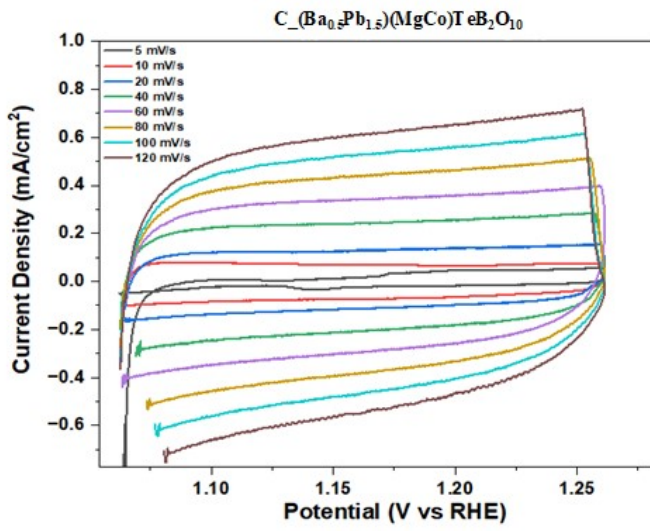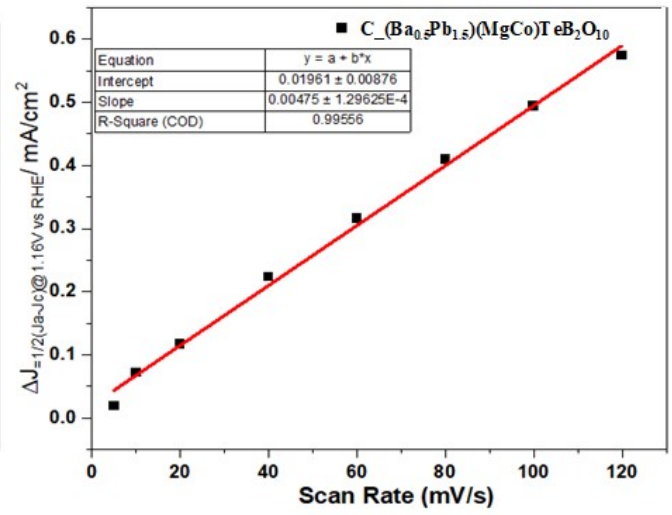

The electrochemically active surface area (ECSA) calculated by the double layer capacitance.<sup>17</sup>

$$ECSA = \frac{C_{dl}}{C_s}$$

$C_{dl}$  – Double layer capacitance;  $C_s$  – Specific capacitance ( $40 \mu\text{F}/\text{cm}^2$ ). Double layer charging current ( $i_c$ ) is product of scan rate  $v$  (mV/s) and double layer capacitance. If  $i_c$  is plotted as a function of  $v$ , then slope will be  $C_{dl}$ .

Electrochemically active surface area for  $(\text{Ba}_{0.5}\text{Pb}_{1.5})(\text{MgCo})\text{TeB}_2\text{O}_{10}$  is  $2.418 \text{ cm}^2$  whereas  $C_{dl}(\text{Ba}_{0.5}\text{Pb}_{1.5})(\text{MgCo})\text{TeB}_2\text{O}_{10}$  is  $8.383 \text{ cm}^2$ .

Figure S16. Electrochemically active surface area for  $C_{dl}(\text{Ba}_{0.5}\text{Pb}_{1.5})(\text{MgCo})\text{TeB}_2\text{O}_{10}$

#### **Determination of Turn Over Frequency (TOF) value from OER current<sup>18</sup>**

$$\text{TOF} = (i \times N_A) / (A \times F \times n \times r)$$

$i$  – current (A);  $N_A$  – Avogadro number ( $6.023 \times 10^{23}$ );  $A$  – Geometrical surface area of the working electrode;  $F$  – Faraday constant ( $96485 \text{ C/mol}$ );  $n$  – Number of electrons involved ( $n = 4$  for OER);  $r$  – Surface concentration calculated from LSV redox peak method.

#### **Determination of Surface Concentration of $C_{dl}(\text{Ba}_{0.5}\text{Pb}_{1.5})(\text{MgCo})\text{TeB}_2\text{O}_{10}$ from LSV redox peak in the alkaline medium.<sup>19</sup>**

Area from  $\text{Co}^{2+}$  to  $\text{Co}^{3+}$  redox peak =  $5.350 \times 10^{-3} \text{ V mA}$ ; Charge =  $5.350 \times 10^{-3} \text{ V mA} / 0.01 \text{ V s}^{-1} = 5.350 \times 10^{-4} \text{ Coulombs}$  ( $q = I \times t = A \times s$ ); To find number of electron:  $5.350 \times 10^{-4} \text{ C} / 1.602 \times 10^{-19} \text{ C} = 3.339 \times 10^{15}$ . The value divide by the  $1e^-$  transfer in the redox reaction gives,  $3.339 \times 10^{15}$  atoms.

The OER current of  $1 \text{ mA}/\text{cm}^2$  observed at  $1.560 \text{ V vs. RHE}$ ,  $10 \text{ mA}/\text{cm}^2$  observed at  $1.664 \text{ V vs. RHE}$  and  $40 \text{ mA}/\text{cm}^2$  observed at  $1.928 \text{ V vs. RHE}$ .

$$\text{TOF}_{1.56\text{V @ } 1\text{mA/cm}^2} = \{(1 \times 10^{-3}) \times (6.023 \times 10^{23})\} / \{(1) \times (96485 \times (4) \times (3.339 \times 10^{15}))\} = 0.467 \text{ s}^{-1}.$$

$$\text{TOF}_{1.664\text{V @ } 10\text{mA/cm}^2} = 4.673 \text{ s}^{-1}. \quad \text{TOF}_{1.928\text{V @ } 40 \text{mA/cm}^2} = 18.695 \text{ s}^{-1}.$$

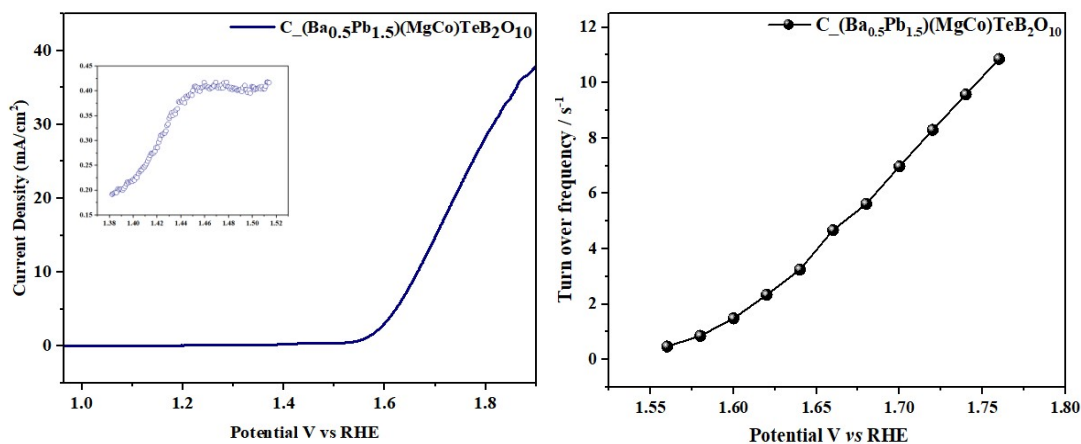

Figure S17. Turn over frequency calculation for  $\text{C}_{-}(\text{Ba}_{0.5}\text{Pb}_{1.5})(\text{MgCo})\text{TeB}_2\text{O}_{10}$ .

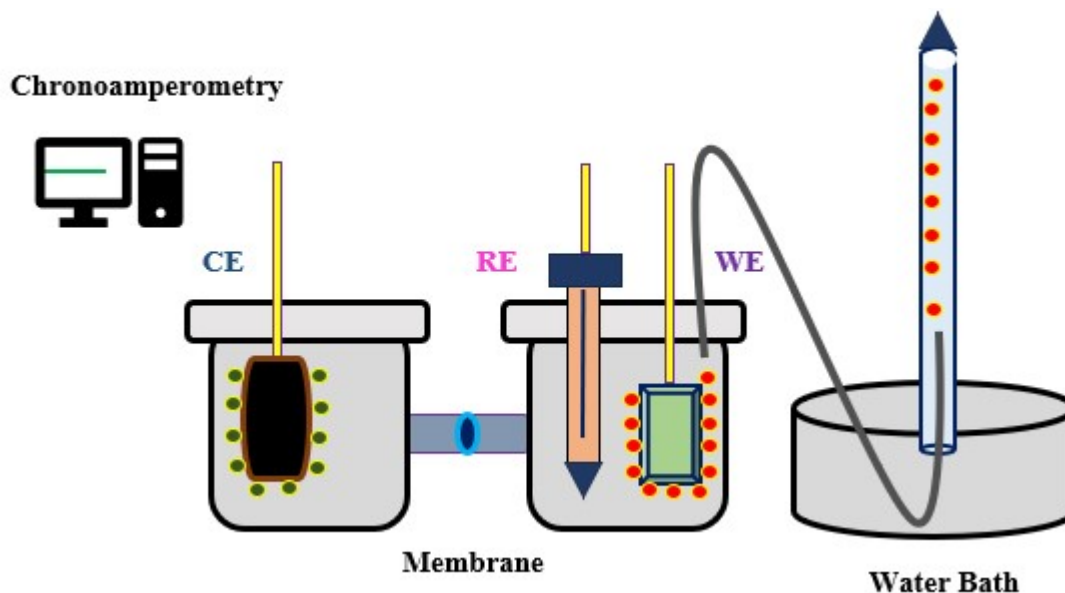

Figure S18. Diagram of inverse burette experimental setup.<sup>20</sup>

We were able to quantify the amount of oxygen gas evolved from alkaline oxygen evolution reaction as a function of time. The chronoamperometric experiment was carried out using H-shaped electrochemical cell as shown in figure S23, to quantify the amount of oxygen gas evolved. The carbon cloth coated with  $\text{C}_{-}(\text{Ba}_{0.5}\text{Pb}_{1.5})(\text{MgCo})\text{TeB}_2\text{O}_{10}$  and the WE was kept in one compartment of H-shaped cell along with reference electrode (Hg – HgO electrode). A large area counter electrode (graphite rod) was kept in the other compartment. The quantity of oxygen gas evolved was measured using inverse burette method.

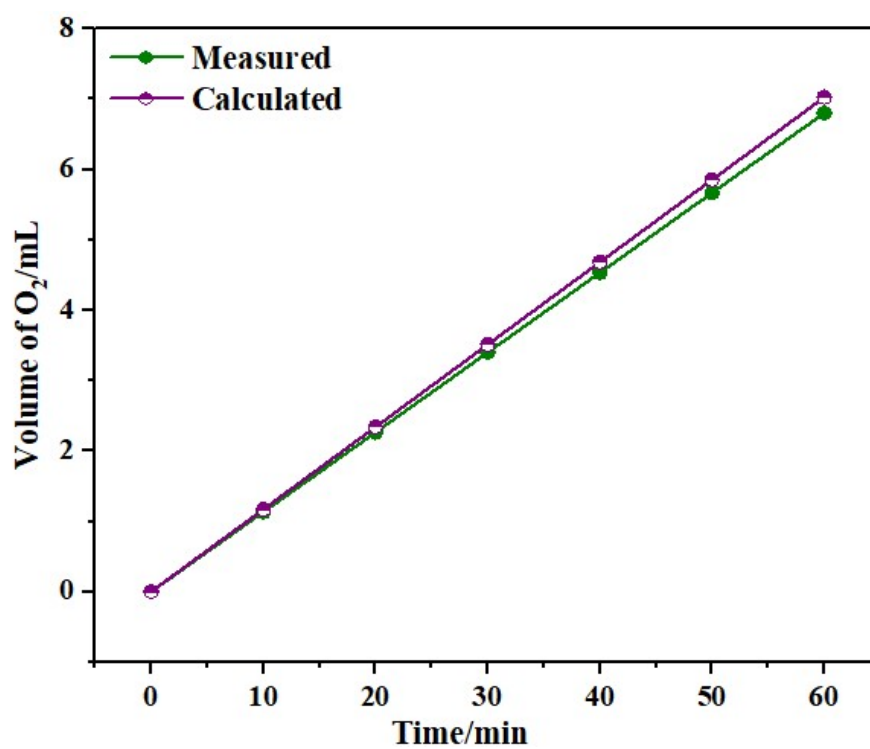

Figure S19. Oxygen production efficiency of  $C_{-}(\text{Ba}_{0.5}\text{Pb}_{1.5})(\text{MgCo})\text{TeB}_2\text{O}_{10}$ .

Measured vs. calculated actual oxygen production catalysed by  $C_{-}(\text{Ba}_{0.5}\text{Pb}_{1.5})(\text{MgCo})\text{TeB}_2\text{O}_{10}$  after a pretreatment of 30 min. The calculated data represents the expected amount of O<sub>2</sub> gas assuming a quantitative faradaic yield for oxygen gas formation in alkaline medium.



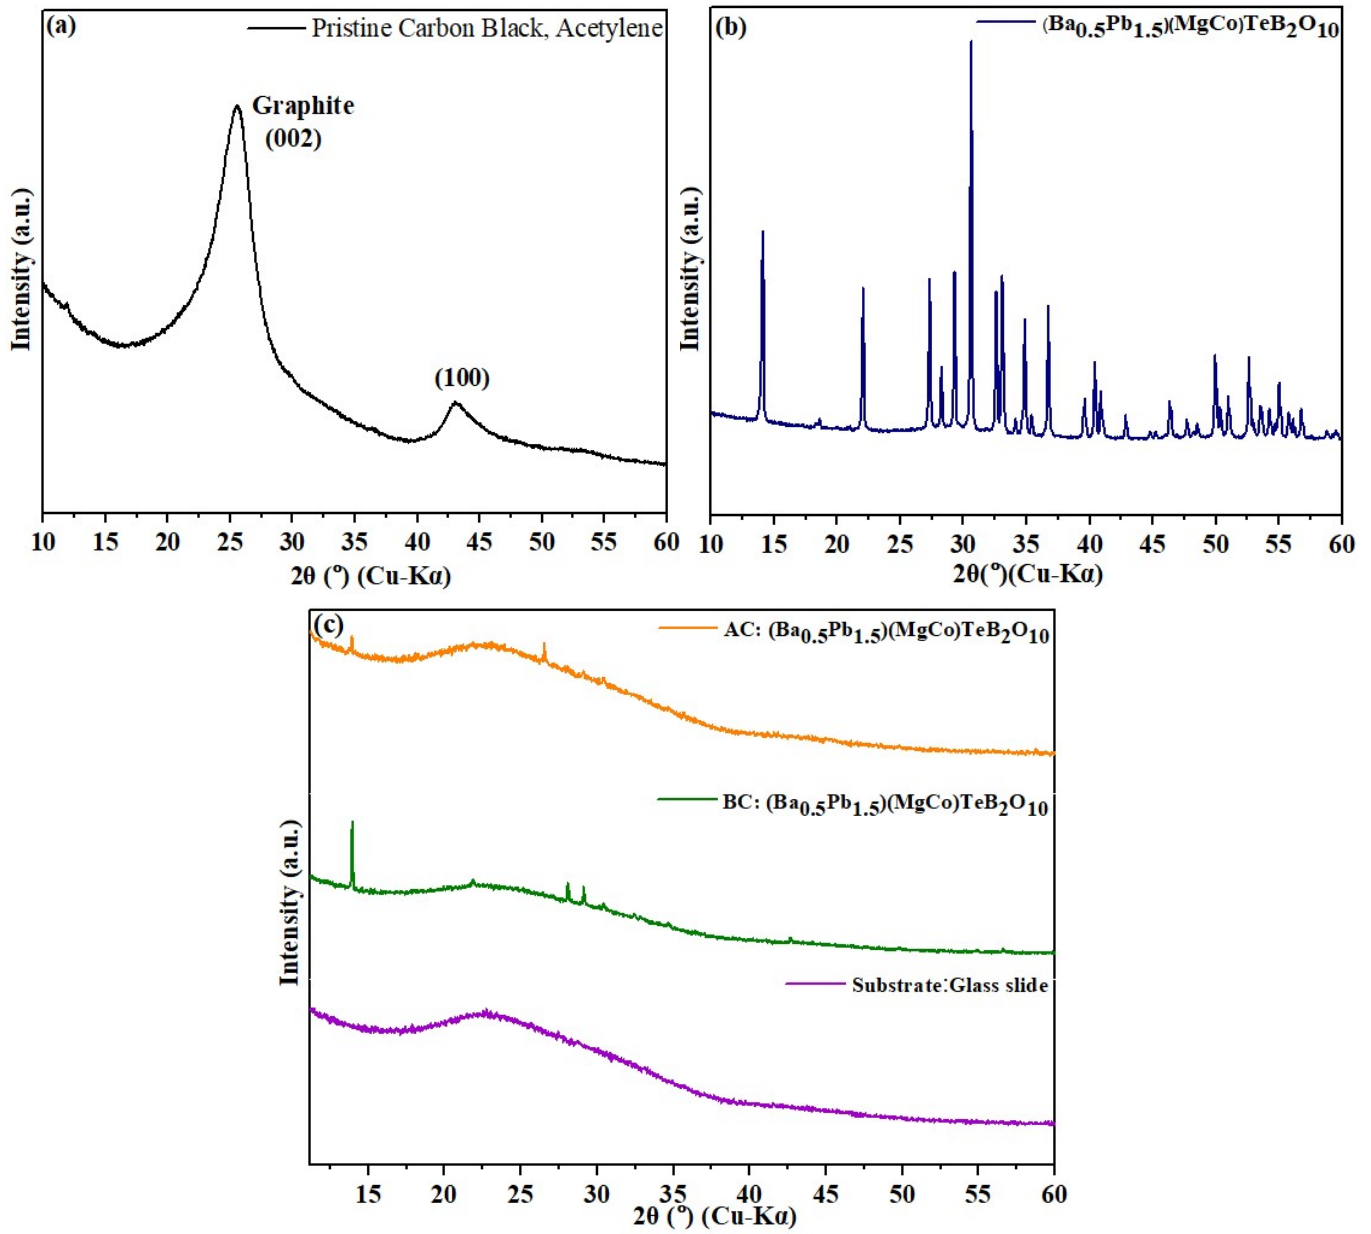



To check the material after electrocatalysis, pattern, after

| Entry    | Ratio of 1a:2 | Yield (%) 3a | Yield (%) 4a |
|----------|---------------|--------------|--------------|
| 1        | 2:1           | 45           | 15           |
| 2        | 1:1           | 55           | 10           |
| 3        | 1:2           | 60           | 05           |
| <b>4</b> | <b>1:3</b>    | <b>75</b>    | <b>trace</b> |

stability, before and performed PXRD electrocatalysis is

1000 cycle of cyclic voltammetry (scan rate: 10 mV/s) in the faradaic region.

Figure S20. The PXRD (a) Pristine Carbon Black, Acetylene (b)  $(\text{Ba}_{0.5}\text{Pb}_{1.5})(\text{MgCo})\text{TeB}_2\text{O}_{10}$  (c) Before and after electrocatalysis

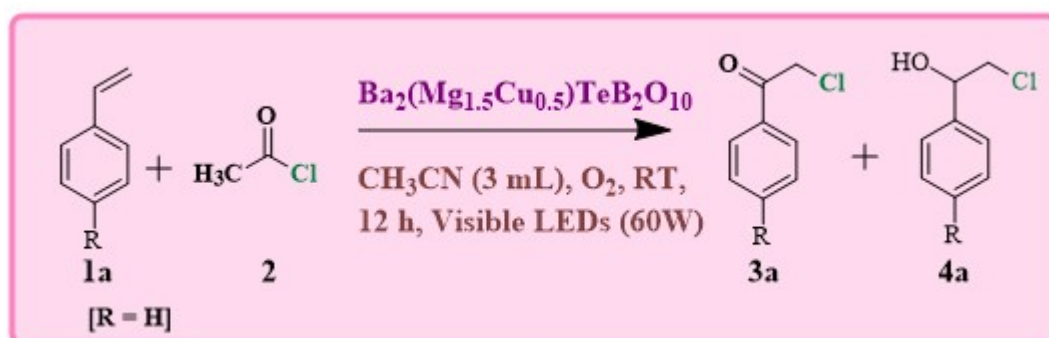

Table S6. Optimised reaction condition: screening of starting materials ratio

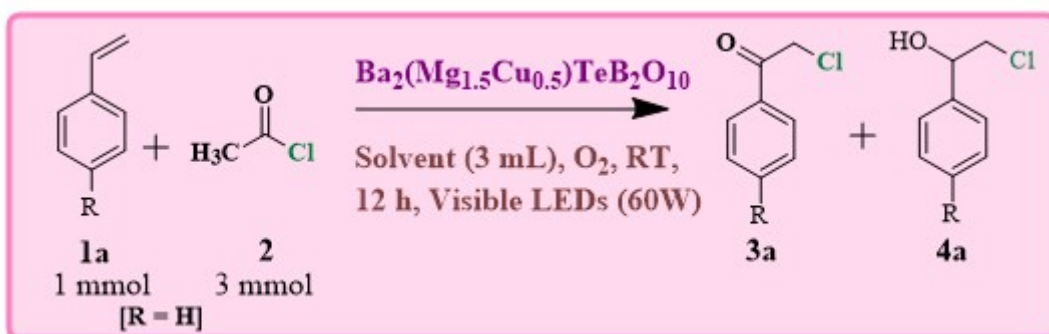

Table S7. Optimised reaction condition: solvent screening

$\text{Ba}_2(\text{Mg}_{1.5}\text{Cu}_{0.5})\text{TeB}_2\text{O}_{10}$   
 $\text{CH}_3\text{CN}$  (3 mL),  $\text{O}_2$ , RT,  
 12 h, Visible LEDs (60W)

**1a** + **2** → **3a** + **4a**  
 1 mmol      3 mmol  
 [R = H]

| Entry | Solvent                                 | Yield (%)<br>3a | Yield (%)<br>4a |
|-------|-----------------------------------------|-----------------|-----------------|
| 1     | <b>Acetonitrile</b>                     | <b>75</b>       | <b>trace</b>    |
| 2     | Ethanol                                 | 49              | 12              |
| 3     | Methanol                                | 45              | 11              |
| 4     | Isopropyl alcohol                       | 48              | 08              |
| 5     | Tetrahydrofuran                         | 10              | 06              |
| 6     | Dimethyl formamide                      | 05              | trace           |
| 7     | Dichloromethane                         | 08              | 10              |
| 8     | 1,2-Dichloroethane                      | 10              | 15              |
| 9     | Dimethylacetamide                       | 05              | trace           |
| 10    | 1,4-Dioxane                             | 14              | trace           |
| 11    | Water                                   | 0               | 0               |
| 12    | Dimethyl sulfoxide                      | 0               | 0               |
| 13    | Ethyl acetate + Isopropyl alcohol (9:1) | 20              | 05              |

Table S8. Control experiments for oxochlorination of vinyl arene

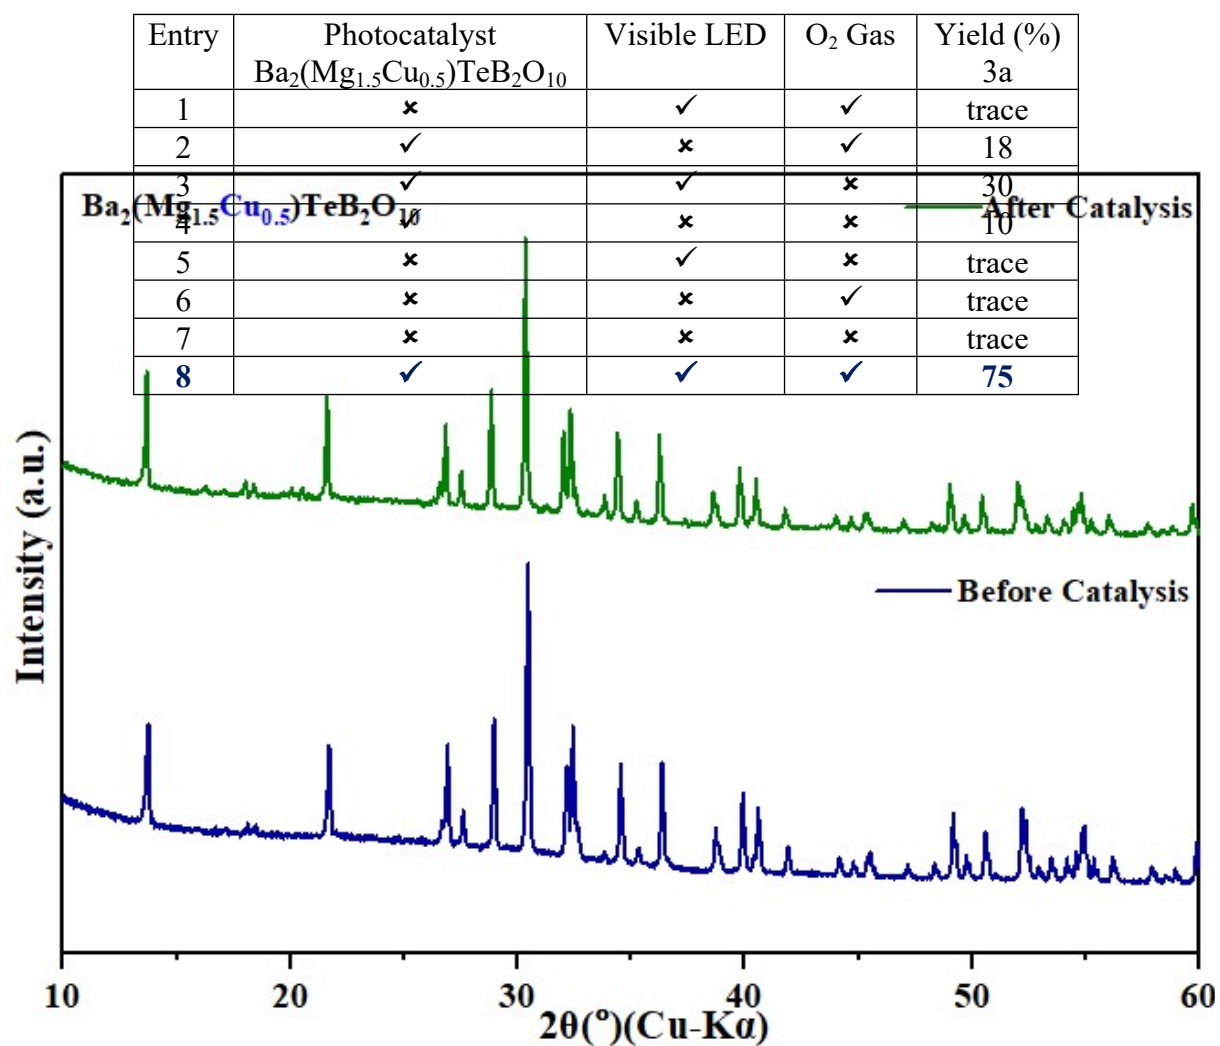

Figure S21. PXRD Pattern of  $\text{Ba}_2(\text{Mg}_{1.5}\text{Cu}_{0.5})\text{TeB}_2\text{O}_{10}$  before and after photocatalysis.

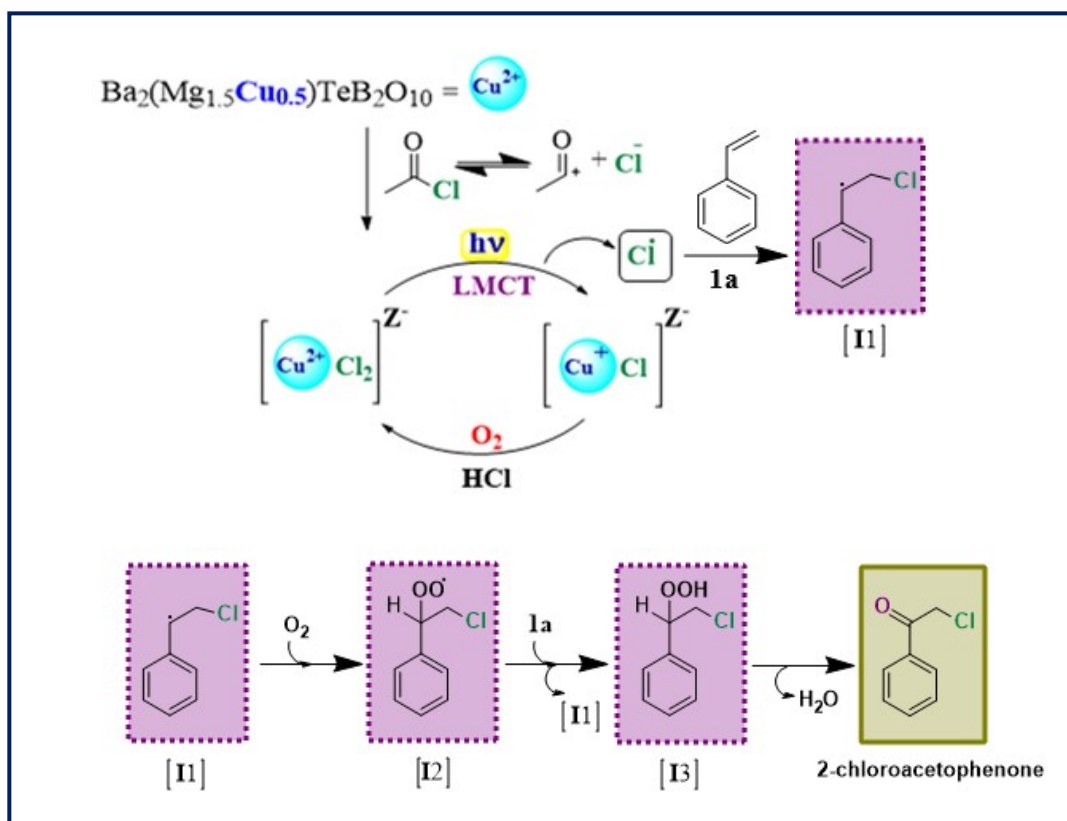

Figure S22. The proposed reaction mechanism for the photocatalytic oxidative halogenation of vinyl arenes.<sup>21</sup>

| Photocatalyst                                                                          | Chlorine Source                      | Reaction Condition                                      | Isolated Yield | Ref       |
|----------------------------------------------------------------------------------------|--------------------------------------|---------------------------------------------------------|----------------|-----------|
| Cu-C <sub>3</sub> N <sub>4</sub>                                                       | NiCl <sub>2</sub> ·6H <sub>2</sub> O | 410 nm LED, 1 mL of IPA in 9 mL of EtOAc, RT, Air, 12 h | 99%            | 21        |
| CuCl <sub>2</sub>                                                                      | MgCl <sub>2</sub>                    | 455 nm LED, TFA, MeCN, O <sub>2</sub> or air, 36 h      | 76%            | 22        |
| [Cu <sup>I</sup> (dmp) <sub>2</sub> ]Cl                                                | AcCl                                 | 455 nm LED, MeCN, RT, Air, 36 h                         | 76%            | 23        |
| [Cu <sup>II</sup> (dmp) <sub>2</sub> Cl]Cl                                             | AcCl                                 | 455 nm LED, MeCN, RT, Air, 36 h                         | 74%            | 23        |
| Ba <sub>2</sub> (Mg <sub>1.5</sub> Cu <sub>0.5</sub> )TeB <sub>2</sub> O <sub>10</sub> | AcCl                                 | Visible light LED, MeCN, RT, O <sub>2</sub> , 12 h      | 75%            | This work |

Table S9. The comparison of the literature reported catalyst for the visible light mediated oxochlorination of vinyl arenes

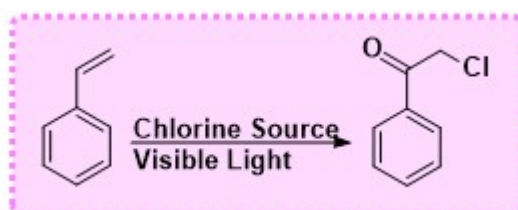

**$^1\text{H}$  NMR (400 MHz,  $\text{CDCl}_3$ ) spectra (3a-3d)**

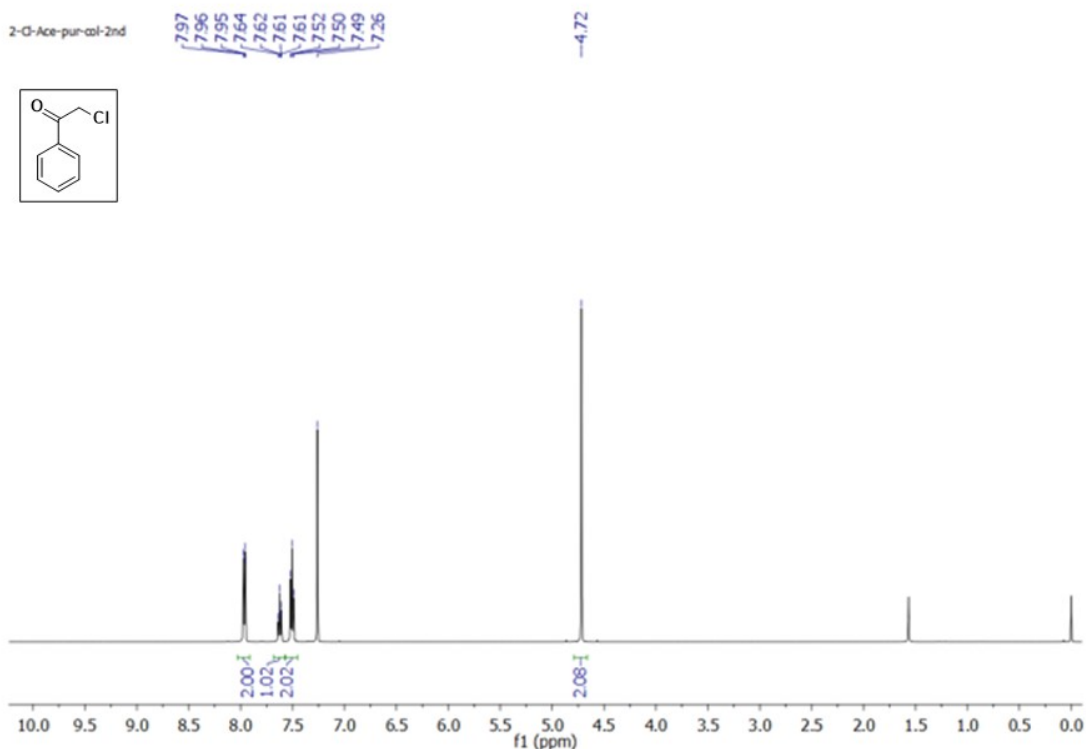

Figure S23. NMR Spectra of 2-Chloro-1-phenylethan-1-one (3a): Yellow Solid.  $R_f$  (10% EtOAc/hexane): 0.38. Purification by column chromatography.  $^1\text{H}$  NMR (500 MHz,  $\text{CDCl}_3$ ):  $\delta$  (ppm) 8.03 – 7.91 (m, 2H), 7.62 (dd,  $J = 10.6, 4.2$  Hz, 1H), 7.50 (t,  $J = 7.8$  Hz, 2H), 4.72 (s, 2H). The spectral data of this chemical matches previous work<sup>21</sup>.

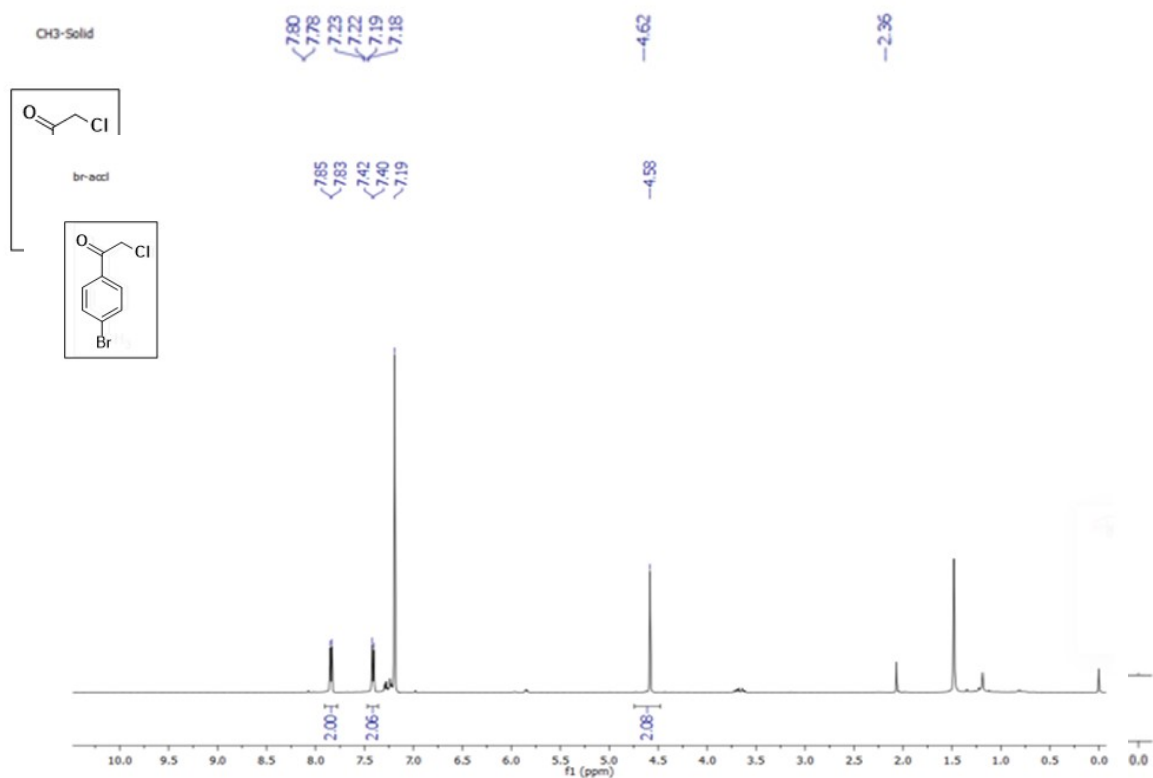

Figure S24. NMR Spectra of 2-Chloro-1-(*p*-tolyl)ethan-1-one (3b): Colorless Solid.  $R_f$  (10% EtOAc/hexane): 0.38. Purification by column chromatography.  $^1\text{H}$  NMR (500 MHz,  $\text{CDCl}_3$ )

$\delta$  7.79 (d,  $J = 8.1$  Hz, 2H), 7.22 (d,  $J = 7.9$  Hz, 2H), 4.62 (s, 2H), 2.36 (s, 3H). The spectral data of this chemical matches previous work<sup>21</sup>.

Figure S25. NMR Spectra of 2-Chloro-1-(4-bromophenyl)ethan-1-one (3c) : Colorless Solid.  $R_f$  (10% EtOAc/hexane): 0.39. Purification by column chromatography.  $^1\text{H NMR}$  (500 MHz,  $\text{CDCl}_3$ )  $\delta$  (ppm) 7.84 (d,  $J = 8.5$  Hz, 2H), 7.41 (d,  $J = 8.5$  Hz, 2H), 4.58 (s, 2H). The spectral data of this chemical matches previous work<sup>21</sup>.

Figure S26. NMR Spectra of 2-Chloro-1-(4-chlorophenyl)ethan-1-one (3d): Colorless Solid.  $R_f$  (10% EtOAc/hexane): 0.35. Purification by column.  $^1\text{H NMR}$  (500 MHz,  $\text{CDCl}_3$ )  $\delta$  (ppm) 7.93 (d,  $J = 8.5$  Hz, 1H), 7.50 (d,  $J = 8.5$  Hz, 1H), 4.67 (s, 1H). The spectral data of this chemical matches previous work<sup>21</sup>.

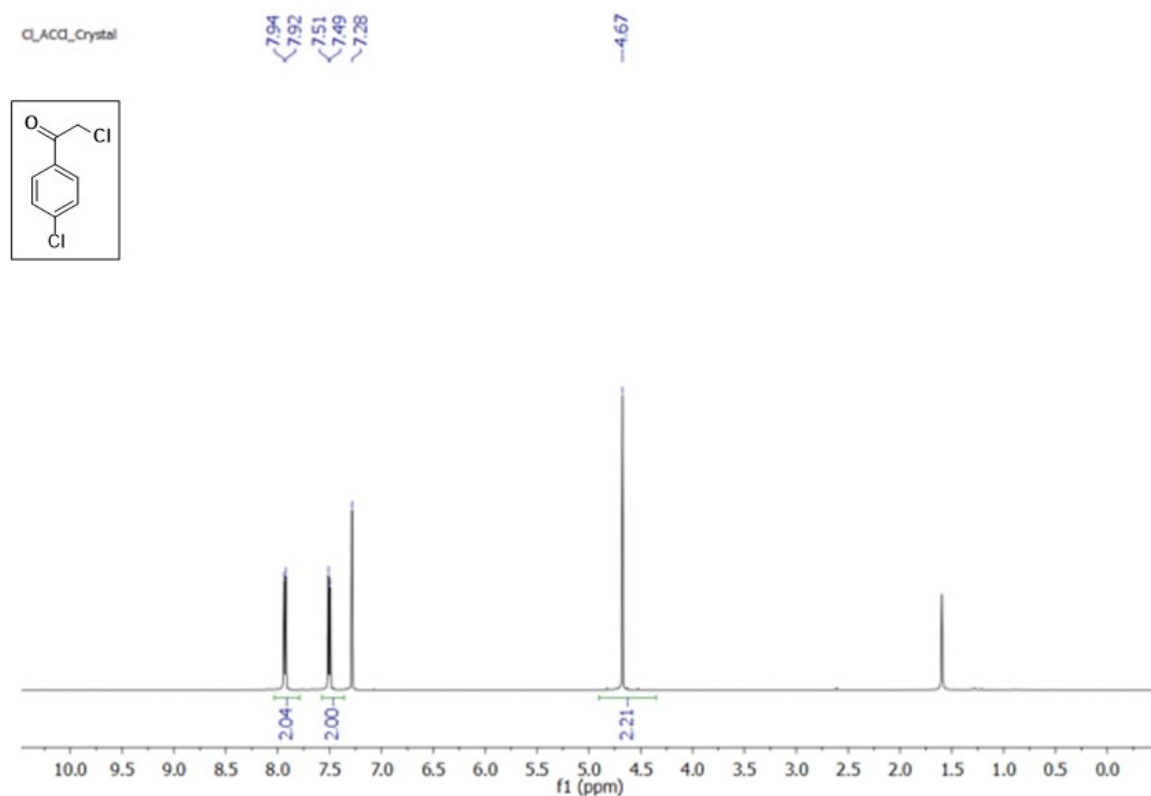



## Reference

- 1 R. A. V. Rossel, R. N. McGlynn and A. B. McBratney, *Geoderma*, 2006, **137**, 70–82.
- 2 P. Makuła, M. Pacia and W. Macyk, *J Phys Chem Lett*, 2018, **9**, 6814–6817.
- 3 Y. Feng, S. Lin, S. Huang, S. Shrestha and G. Conibeer, *J Appl Phys*.
- 4 A. J. Bard and L. R. Faulkner, *Surf. Technol*, 1983, **20**, 91–92.
- 5 D. B. Hibbert and D. B. Hibbert, *Introduction to electrochemistry*, Springer, 1993.
- 6 D. L. Rousseau, R. P. Bauman and S. P. S. Porto, *Journal of Raman Spectroscopy*, 1981, **10**, 253–290.
- 7 S. Kesari, R. Rao, M. K. Gupta, R. Mittal and G. Balakrishnan, *Journal of Raman Spectroscopy*, 2019, **50**, 587–594.
- 8 R. D. Shannon, *J Appl Phys*, 1993, **73**, 348–366.
- 9 A. B. P. Lever and S. A. Rice, 1969.

- 10 D. N. Sathyanarayana, *Electronic absorption spectroscopy and related techniques*, Universities Press, 2001.
- 11 M. Kozielski, I. Pollini and G. Spinolo, *Journal of Physics C: Solid State Physics*, 1972, **5**, 1253.
- 12 K. B. N. Sarma, B. J. Reddy and S. V. J. Lakshman, *Phys Lett A*, 1982, **92**, 305–308.
- 13 I. Fontana, A. Lauria and G. Spinolo, *Physica status solidi (b)*, 2007, **244**, 4669–4677.
- 14 K. Kawashima, R. A. Márquez, Y. J. Son, C. Guo, R. R. Vaidyula, L. A. Smith, C. E. Chukwuneke and C. B. Mullins, *ACS Catal*, 2023, **13**, 1893–1898.
- 15 D. Tripathy and S. Sampath, *J Power Sources*, 2020, **478**, 229066.
- 16 J.-C. Dupin, D. Gonbeau, P. Vinatier and A. Levasseur, *Physical Chemistry Chemical Physics*, 2000, **2**, 1319–1324.
- 17 J.-J. Jow, L.-Y. Hsieh, H.-P. Cho, H.-R. Chen and C.-W. Kuo, *Journal of Industrial and Engineering Chemistry*, 2013, **19**, 1730–1734.
- 18 S. Anantharaj, P. E. Karthik and S. Kundu, *Catal Sci Technol*, 2017, **7**, 882–893.
- 19 Y. Yan, X. Ge, Z. Liu, J.-Y. Wang, J.-M. Lee and X. Wang, *Nanoscale*, 2013, **5**, 7768–7771.
- 20 V. Kiran, D. Mukherjee, R. N. Jenjeti and S. Sampath, *Nanoscale*, 2014, **6**, 12856–12863.
- 21 F. Han, D. Zhang, S. Salli, J. Ye, Y. Li, F. Rosei, X.-D. Wen, H. Niemantsverdriet, E. Richards and R. Su, *ACS Catal*, 2022, **13**, 248–255.
- 22 X. He, H. Chang, Y. Zhao, X. Li, S. Liu, Z. Zang, C. Zhou and G. Cai, *Chemistry—An Asian Journal*, 2023, **18**, e202200954.
- 23 Z. Wang, L. Wang, Z. Wang, P. Li and Y. Zhang, *Chinese Chemical Letters*, 2021, **32**, 429–432.
